# Supplementary material
Source: PubMed Central journal article supplement (PMC10124999)
Supplement: mmc1.pdf [file mmc1.pdf]

# THE LANCET

## Digital Health

### **Supplementary appendix**

This appendix formed part of the original submission and has been peer reviewed.  
We post it as supplied by the authors.

Supplement to: Shaffer KM, Turner KL, Siwik C, et al. Digital health and telehealth in cancer care: a scoping review of reviews. *Lancet Digit Health* 2023; **5**: e316–27.

Supplementary Table 1. Search Strategies

| Database           | Query                                                                                                                                                                                                                                                                                                                                                                                                                                                                                                                                                                                                                                                                                                                                                                                                                                                                                                                                                                                                                                                                                                                                                                                                                                                                                                                                                                                                                                                                                                                                                                                                                                                                                                                      | Limiters/Expanders            | Last Run Via                                                             |
|--------------------|----------------------------------------------------------------------------------------------------------------------------------------------------------------------------------------------------------------------------------------------------------------------------------------------------------------------------------------------------------------------------------------------------------------------------------------------------------------------------------------------------------------------------------------------------------------------------------------------------------------------------------------------------------------------------------------------------------------------------------------------------------------------------------------------------------------------------------------------------------------------------------------------------------------------------------------------------------------------------------------------------------------------------------------------------------------------------------------------------------------------------------------------------------------------------------------------------------------------------------------------------------------------------------------------------------------------------------------------------------------------------------------------------------------------------------------------------------------------------------------------------------------------------------------------------------------------------------------------------------------------------------------------------------------------------------------------------------------------------|-------------------------------|--------------------------------------------------------------------------|
| PubMed/<br>MEDLINE | <p>((("Neoplasms"[Mesh] OR cancer[tiab] OR neoplasm[tiab] OR neoplasms[tiab] OR "secondary cancer" [tiab] OR "secondary malignancy"[tiab] OR "second primary"[tiab] OR "second cancer" [tiab] OR "second* malignanc*" [tiab]) AND ((Telemedicine[mesh] OR telemedicine[tiab] OR "virtual visit"[tw] OR "virtual appointment"[tw] OR "video visit"[tw] OR "online visit"[tw] OR "online appointment"[tw] OR "e-consult"[tw] OR "e-consultation"[tw] OR remote consultation[mesh] OR "remote consult"[tiab] OR "remote consultation"[tiab] OR teleconsultation[mesh] OR "teleconsultation"[tiab] OR "teleconsult"[tiab] OR "videoconference"[tiab] OR "wearables"[tiab] OR "mobile sensing"[tiab] OR "mobile health"[tiab] OR "smartwatch*" [tiab] OR "eHealth"[tiab] OR "mHealth"[tiab] OR "social media"[tiab] OR "text messag*" [tiab]) OR ((telephone*[tiab] OR online[tiab] OR digital[tiab] OR mobile[tiab] OR internet[tiab] OR technolog*[tw] OR "technology-based"[tiab] OR "text messag*" [tiab]) AND (intervention[tw] OR interventions[tw]))) AND (((systematic review[ti] OR systematic literature review[ti] OR systematic scoping review[ti] OR systematic narrative review[ti] OR systematic qualitative review[ti] OR systematic evidence review[ti] OR systematic quantitative review[ti] OR systematic meta-review[ti] OR systematic critical review[ti] OR systematic mixed studies review[ti] OR systematic mapping review[ti] OR systematic Cochrane review[ti] OR systematic search and review[ti] OR systematic integrative review[ti]) NOT comment[pt] NOT (protocol[ti] OR protocols[ti])) NOT MEDLINE [subset]) OR (Cochrane Database Syst Rev[ta] AND review[pt]) OR systematic review[pt]))</p> | Filters – Language: English   | PubMed, including PubMedCentral and MEDLINE<br>Display mode: Most recent |
| CINAHL             | (MH "Meta Analysis") OR TI meta analys* OR AB meta analys* OR TI Metaanaly* OR AB metaanaly* OR (MH "Literature Review+") OR TI systematic review* OR AB systematic review* OR TI systematic overview*                                                                                                                                                                                                                                                                                                                                                                                                                                                                                                                                                                                                                                                                                                                                                                                                                                                                                                                                                                                                                                                                                                                                                                                                                                                                                                                                                                                                                                                                                                                     | Limiters – Language: English; | Interface - EBSCOhost                                                    |

|                  |                                                                                                                                                                                                                                                                                                                                                                                                                                                                                                                                                                                                                                                                                                                                                                                                                                                         |                                                                                                                                              |                                    |
|------------------|---------------------------------------------------------------------------------------------------------------------------------------------------------------------------------------------------------------------------------------------------------------------------------------------------------------------------------------------------------------------------------------------------------------------------------------------------------------------------------------------------------------------------------------------------------------------------------------------------------------------------------------------------------------------------------------------------------------------------------------------------------------------------------------------------------------------------------------------------------|----------------------------------------------------------------------------------------------------------------------------------------------|------------------------------------|
|                  | OR AB systematic overview* NOT (PT commentary OR PT letter OR PT editorial OR MH animals+) AND ((Telemedicine OR virtual visit OR virtual appointment OR video visit* OR online visit OR online appointment OR e-consult OR e-consultation OR remote consultation OR remote consult OR remote consultation OR teleconsultation OR teleconsult OR videoconference OR wearables OR mobile sensing OR smartwatch* OR eHealth OR mHealth OR social media OR text messag* OR MH Telemed OR MH Telehealth OR MH Videoconference OR MH social media) OR ((telephone* OR online OR digital OR mobile OR internet OR technolog* OR "technology-based" OR "text messag*") AND (intervention* OR interventions))) AND (Neoplasm* OR cancer* OR secondary cancer OR secondary malignancy OR second primary OR second cancer OR second* malignanc* OR MH"Neoplasms") | Academic journals only; Peer Review                                                                                                          | CINAHL w/ Full Text                |
| PsycINFO         | "Meta Analysis" OR "meta analys*" OR Metaanaly* OR "Literature Review*" OR "systematic review*" OR "systematic overview*" NOT (commentary OR letter OR editorial OR animals) AND (Telemedicine OR virtual visit OR virtual appointment OR video visit* OR online visit OR online appointment OR e-consult OR e-consultation OR remote consultation OR remote consult OR remote consultation OR teleconsultation OR teleconsult OR videoconference OR wearables OR mobile sensing OR smartwatch* OR eHealth OR mHealth OR social media OR text messag* OR "telemed" OR telehealth OR videoconference OR "social media") AND (Neoplasm* OR cancer* OR secondary cancer OR secondary malignancy OR second primary OR second cancer OR second* malignanc*)                                                                                                  | Limiters – Language: English; Academic journals only; Peer Review                                                                            | Interface - EBSCOhost APA Psycinfo |
| Cochrane Reviews | (Neoplasm* OR cancer* OR secondary cancer OR secondary malignancy OR second primary OR second cancer OR second* malignanc*) AND (Telemedicine OR virtual visit OR virtual appointment OR video visit* OR online visit OR online appointment OR e-consult OR e-consultation OR remote consultation OR remote consult OR remote consultation OR teleconsultation OR teleconsult OR videoconference OR wearables OR mobile sensing OR smartwatch* OR eHealth OR mHealth OR social media OR text messag*)                                                                                                                                                                                                                                                                                                                                                   | Filters – English; Pub type: only reviews; MeSH were not used in Cochrane because citations would have been identified through PubMed search | Cochrane Library                   |

|                       |                                                                                                                                                                                                                                                                                                                                                                                                                                                                                                                                                                                                                                                                                                                                                                                                                                                                                                                                                                                                                                                                                                                                            |                                                                                                          |                                                  |
|-----------------------|--------------------------------------------------------------------------------------------------------------------------------------------------------------------------------------------------------------------------------------------------------------------------------------------------------------------------------------------------------------------------------------------------------------------------------------------------------------------------------------------------------------------------------------------------------------------------------------------------------------------------------------------------------------------------------------------------------------------------------------------------------------------------------------------------------------------------------------------------------------------------------------------------------------------------------------------------------------------------------------------------------------------------------------------------------------------------------------------------------------------------------------------|----------------------------------------------------------------------------------------------------------|--------------------------------------------------|
| <p>Web of Science</p> | <p>(TS=(systematic review OR systematic literature review OR systematic scoping review OR systematic narrative review OR systematic qualitative review OR systematic evidence review OR systematic quantitative review OR systematic meta-review OR systematic critical review OR systematic mixed studies review OR systematic mapping review OR systematic Cochrane review OR systematic search and review OR systematic integrative review)) AND (TS=(Neoplasm* OR cancer* OR secondary cancer OR secondary malignancy OR second primary OR second cancer OR second* malignanc*) AND ((Telemedicine OR virtual visit OR virtual appointment OR video visit* OR online visit OR online appointment OR e-consult OR e-consultation OR remote consultation OR remote consult OR remote consultation OR teleconsultation OR teleconsult OR videoconference OR wearables OR mobile sensing OR smartwatch* OR eHealth OR mHealth OR social media OR text messag*) OR ((<i>telephone* OR online OR digital OR mobile OR internet OR technolog* OR "technology-based" OR "text messag*"</i>)) AND (<i>intervention OR interventions</i>))))</p> | <p>Limiters –<br/>Language: English;<br/>Publication Types:<br/>Review Articles and<br/>Early Access</p> | <p>Clarivate Web of Sciences Core Collection</p> |
|-----------------------|--------------------------------------------------------------------------------------------------------------------------------------------------------------------------------------------------------------------------------------------------------------------------------------------------------------------------------------------------------------------------------------------------------------------------------------------------------------------------------------------------------------------------------------------------------------------------------------------------------------------------------------------------------------------------------------------------------------------------------------------------------------------------------------------------------------------------------------------------------------------------------------------------------------------------------------------------------------------------------------------------------------------------------------------------------------------------------------------------------------------------------------------|----------------------------------------------------------------------------------------------------------|--------------------------------------------------|

\*Special thanks to the National Institutes of Health and the Canadian Agency for Drugs and Technologies in Health (CADTH) for their publicly available search filters and/or hedges. We adapted terms to find only systematic reviews.

Note: Italicized text represents phrases added from peer review process (search executed September 2022). PsychINFO and Cochrane Reviews searches were not updated, as adding the new phrase did not identify any novel records from the prior search.

Supplementary Table 2. Data Items

| Category                      | Data Item                   | Description                                                                                                                                                                | Coding                                                                                                                                                                                                                                                                                                                                                                                                         |
|-------------------------------|-----------------------------|----------------------------------------------------------------------------------------------------------------------------------------------------------------------------|----------------------------------------------------------------------------------------------------------------------------------------------------------------------------------------------------------------------------------------------------------------------------------------------------------------------------------------------------------------------------------------------------------------|
| Review information            | Inclusive years             | Years of publication considered eligible for inclusion in a review                                                                                                         | Earliest year coded 'earliest available' if no earliest eligible year specified.<br>Latest year coded as year search was conducted or year of review publication if no date of search specified.                                                                                                                                                                                                               |
|                               | Number of included articles | Number of records analyzed in a review                                                                                                                                     | n/a                                                                                                                                                                                                                                                                                                                                                                                                            |
|                               | Search constructs           | Terms indicating broad constructs of the review search strategy                                                                                                            | Coded according to terms listed by authors where specified; where only full search strategies were listed, a representative term from the full list was utilized                                                                                                                                                                                                                                               |
| Review purpose and conclusion | Purpose                     | Authors' objective in conducting the review                                                                                                                                | Paraphrased from review text                                                                                                                                                                                                                                                                                                                                                                                   |
|                               | Conclusion                  | Authors' deductions from the review (paraphrased)                                                                                                                          | Paraphrased from review text                                                                                                                                                                                                                                                                                                                                                                                   |
| Population                    | Individual targeted         | The population targeted by the telehealth intervention to improve their own health, education, or care provision                                                           | <u>Patient</u> = Individual at risk for cancer (as in for preventive interventions), receiving cancer treatment, or who completed treatment (i.e., survivor)<br><u>Family</u> = Family member of a patient, inclusive of partners, close friends, family caregivers<br><u>Healthcare personnel</u> = Professional healthcare providers                                                                         |
|                               | Cancer type                 | Whether the review targeted or included only specific types of cancers; More than one type may be selected where certain cancer types were specified in inclusion criteria | <u>Blood</u> = Inclusive of leukemia, lymphomas, myelomas<br><u>Breast</u><br><u>Colorectal</u> = Inclusive of colon and rectal<br><u>Lung</u><br><u>Prostate</u><br><u>Skin</u> = Inclusive of basal, squamous, and melanoma<br><u>Gynecologic</u> = Inclusive of uterine, ovarian, vulvar, vaginal<br><u>Multiple or not specified</u> = No specific cancer type was specified as part of inclusion criteria |

|              |                               |                                                                                              |                                                                                                                                                                                                                                                                                                                                                                                                                                                                                                                                                                                                                                                                                                                                                                                                                                                                                                                                                                                                                                                                                                                                                                                             |
|--------------|-------------------------------|----------------------------------------------------------------------------------------------|---------------------------------------------------------------------------------------------------------------------------------------------------------------------------------------------------------------------------------------------------------------------------------------------------------------------------------------------------------------------------------------------------------------------------------------------------------------------------------------------------------------------------------------------------------------------------------------------------------------------------------------------------------------------------------------------------------------------------------------------------------------------------------------------------------------------------------------------------------------------------------------------------------------------------------------------------------------------------------------------------------------------------------------------------------------------------------------------------------------------------------------------------------------------------------------------|
|              | Cancer care continuum         | Phase of the cancer continuum <sup>165</sup> where interventions are targeted                | <p><u>Prevention</u> = Interventions intended to reduce risk for cancer occurrence or relapse</p> <p><u>Screening/diagnosis</u> = Interventions intended to detect or diagnose cancer, or address immediate needs at the time of diagnosis (including relapse)</p> <p><u>Treatment/symptom monitoring</u> = Interventions intended to support active cancer treatment and/or monitor symptoms</p> <p><u>Survivorship</u> = Interventions intended to support survivor during remission period (inclusive of transition off-treatment)</p> <p><u>End-of-life/Bereavement</u> = Interventions intended to support end-of-life decision making or comfort, or coping with death of loved one from cancer</p> <p><u>Multiple or not specified</u> = Interventions span across phases, or unclear intended target of interventions</p>                                                                                                                                                                                                                                                                                                                                                           |
| Intervention | Intervention or care provided | Characterization of the type of intervention or care provided by the telehealth intervention | <p><u>Health behavior change</u> = Intervention intended to modify an individuals' behaviors related to cancer prevention and control (e.g., tobacco cessation, weight loss, complete routine screenings)</p> <p><u>Psychosocial support and distress management</u> = Intervention intended to address psychosocial aspects of cancer (e.g., support groups, coping skills training to reduce cancer-related distress)</p> <p><u>Disease detection or management</u> = Intervention intended to screen, detect, or monitor cancer and cancer-related side effects (e.g., symptom monitoring, remote screening)</p> <p><u>Medical decision making</u> = Interventions intended to support individuals' choices about their cancer-related preventive and treatment care plans (e.g., genetic counseling, patient navigation, decision aids)</p> <p><u>Multiple or not specified</u> = Where no single kind of intervention or care was required for inclusion, or unclear intended type of interventions</p> <p><u>Other</u> (with specification) = Where there was a single kind of intervention or care specified for inclusion that did not fit meaningfully in the categories above</p> |

|              |                     |                                                                                                                                             |                                                                                                                                                                                                                                                                                                                                                                                                                                                                                                                                                                                                                                                                                                                                                                                                                                                |
|--------------|---------------------|---------------------------------------------------------------------------------------------------------------------------------------------|------------------------------------------------------------------------------------------------------------------------------------------------------------------------------------------------------------------------------------------------------------------------------------------------------------------------------------------------------------------------------------------------------------------------------------------------------------------------------------------------------------------------------------------------------------------------------------------------------------------------------------------------------------------------------------------------------------------------------------------------------------------------------------------------------------------------------------------------|
|              | Technology modality | The primary telehealth delivery methods of the interventions included in the review                                                         | <p><u>Synchronous telehealth</u> = Direct, two-way connection between a patient and interventionist via telephone or videoconference call</p> <p><u>Text messaging/SMS</u> = Inclusive of automated, 1-way, and bi-directional messaging delivered via cellular text or short messaging service (SMS)</p> <p><u>Email/secure messaging</u> = Inclusive of automated, 1-way, and bi-directional messaging by way of email or native platforms</p> <p><u>eHealth</u> = Delivery by web browser, typically intended for interaction via a computer or tablet</p> <p><u>Mobile application</u> = Apps or programs intended for use specifically via a smartphone</p> <p><u>Other</u> (with specification) = Where an intervention delivery modality used by one or more studies in the review did not fit meaningfully in the categories above</p> |
|              | Human involvement   | Whether there were specific individuals involved in the delivery of the provided care across included interventions                         | <p><u>Healthcare professional</u> = Inclusive of medical, psychological, and related practitioners and providers</p> <p><u>None – fully-automated interventions</u> = Review clearly specifies all included interventions are delivered without involvement of professionals, staff, or other individuals</p> <p><u>Multiple or not specified</u> = Human involvement was not specified as part of study eligibility or data were not clearly extracted to make determination</p>                                                                                                                                                                                                                                                                                                                                                              |
| Study design | Meta-analysis       | Whether the review included a meta-analysis                                                                                                 | <p><u>Yes</u> = All included studies meta-analyzed</p> <p><u>Yes (article subset)</u> = A subset of articles meta-analyzed (e.g., just included RCTs)</p> <p><u>No</u></p>                                                                                                                                                                                                                                                                                                                                                                                                                                                                                                                                                                                                                                                                     |
|              | Comparator required | Whether there was a comparison condition in addition to the telemedicine intervention required as part of inclusion criteria for the review | <p><u>Yes – In-person</u> = Eligibility required trials to have an in-person/face-to-face treatment comparator arm</p> <p><u>Yes – Usual care</u> = Eligibility required trials to have a treatment-as-usual/standard care comparator arm</p> <p><u>Yes – Other telehealth modality</u> = Eligibility required trials to compare two or more telehealth modalities</p>                                                                                                                                                                                                                                                                                                                                                                                                                                                                         |

|                         |                                          |                                                                                                                                                       |                                                                                                                                                                                                                                                                                                                                                                                                                                                                                                                                                                                                                                                                                                                                                                                                                                                                |
|-------------------------|------------------------------------------|-------------------------------------------------------------------------------------------------------------------------------------------------------|----------------------------------------------------------------------------------------------------------------------------------------------------------------------------------------------------------------------------------------------------------------------------------------------------------------------------------------------------------------------------------------------------------------------------------------------------------------------------------------------------------------------------------------------------------------------------------------------------------------------------------------------------------------------------------------------------------------------------------------------------------------------------------------------------------------------------------------------------------------|
|                         |                                          |                                                                                                                                                       | <p><u>Yes – Any</u> = Eligibility required trials to have any kind of comparator arm</p> <p><u>No</u> = No eligibility criterion specified regarding comparator arms, or non-controlled trials eligible for inclusion</p>                                                                                                                                                                                                                                                                                                                                                                                                                                                                                                                                                                                                                                      |
|                         | Meta-analytic outcome                    | Authors’ conclusions based on the meta-analysis                                                                                                       | Paraphrased from review text where Meta-analysis = ‘Yes’ or ‘Yes (article subset)’                                                                                                                                                                                                                                                                                                                                                                                                                                                                                                                                                                                                                                                                                                                                                                             |
|                         | Review type                              | Indicated description of review                                                                                                                       | Coded according to term listed in-text, meta-analyses coded as systematic review                                                                                                                                                                                                                                                                                                                                                                                                                                                                                                                                                                                                                                                                                                                                                                               |
|                         | Methodological quality / bias assessment | Whether the review reported any assessment of included studies’ methodological quality or risk of bias                                                | <p><u>Yes</u></p> <p><u>No</u></p>                                                                                                                                                                                                                                                                                                                                                                                                                                                                                                                                                                                                                                                                                                                                                                                                                             |
| Implementation outcomes | Outcomes extracted                       | Whether reviews reported implementation outcomes, coded according to the terminology and taxonomy established by Proctor and colleagues <sup>11</sup> | <p><u>Acceptability</u> = Measure of perceived intervention agreeableness, inclusive of intervention satisfaction</p> <p><u>Adoption</u> = Measure of intention or action to try an intervention, inclusive of intervention uptake</p> <p><u>Appropriateness</u> = Measure of perceived fit or compatibility of an intervention with user’s life, practice setting, and/or targeted issue</p> <p><u>Feasibility</u> = Measure of how successfully an intervention can be carried out, inclusive of participation rates, attrition, and barriers</p> <p><u>Fidelity</u> = Measure of degree of how intervention was carried out according to plan, inclusive of interventionist treatment adherence, dose or amount of intervention used or completed by participant</p> <p><u>Cost</u> = Inclusive of intervention cost or cost-effectiveness calculations</p> |



Supplementary Table 3. Review Data

| Review information                                                                                           | Review purpose and conclusion                                                                                                                                                                                                                                                                                                                                          | Population                                                                             | Intervention                                                                                                                                                | Study design                                            | Implement. outcomes |
|--------------------------------------------------------------------------------------------------------------|------------------------------------------------------------------------------------------------------------------------------------------------------------------------------------------------------------------------------------------------------------------------------------------------------------------------------------------------------------------------|----------------------------------------------------------------------------------------|-------------------------------------------------------------------------------------------------------------------------------------------------------------|---------------------------------------------------------|---------------------|
| Acuna (2020)<br>Inc: 2013 - 2018<br>N: 11<br>Search: Cancer + education + video                              | Purpose: Describe the use of online videos to improve cancer knowledge and their effects on information preference, behavior change, and knowledge<br>Conclusion: Online videos generally increased cancer knowledge and influenced healthy behavior change where assessed                                                                                             | Ind: Patients<br>Type: Mult / NS<br>Cont: Prevention, Screening / diagnosis            | Care: Mult / NS<br>HI: Mult / NS<br>Tech: eHealth                                                                                                           | MA: No<br>Comp: No<br>Type: Systematic<br>QA: No        | No                  |
| Agboola (2015)<br>Inc: earliest available - 2015<br>N: 20<br>Search: Cancer + telehealth                     | Purpose: Evaluate the effect of supportive telehealth interventions on pain, depression, and quality of life in cancer patients<br>Conclusion: Heterogeneous designs and assessments make pooling effects difficult; findings were generally positive for cancer pain, but not depression or quality of life                                                           | Ind: Patients<br>Type: Mult / NS<br>Cont: Treatment / symptom management, Survivorship | Care: Psychosocial support / distress management<br>HI: Mult / NS<br>Tech: Synchronous telehealth, eHealth                                                  | MA: No<br>Comp: Yes: Any<br>Type: Systematic<br>QA: Yes | No                  |
| Ahmad (2020)<br>Inc: earliest available - 2018<br>N: 13<br>Search: Cancer + anxiety + pain + virtual reality | Purpose: Evaluate studies of and evidence for virtual reality technology for pain and anxiety management among patients with cancer<br>Conclusion: Virtual reality interventions may be beneficial for managing pain and anxiety among patients with cancer                                                                                                            | Ind: Patients<br>Type: Mult / NS<br>Cont: Treatment / symptom management               | Care: Psychosocial support / distress management<br>HI: Mult / NS<br>Tech: Other (Virtual reality)                                                          | MA: No<br>Comp: No<br>Type: Systematic<br>QA: Yes       | No                  |
| Ansari (2022)<br>Inc: 2000 - 2022<br>N: 39<br>Search: Cancer + Palliative care + Technology                  | Purpose: Identify studies of technology-based communication strategies to improve health among individuals with advanced cancer<br>Conclusion: The majority of technology-based communication strategies were focused on information exchange between patients and their providers, and more research is needed related to fostering relationships and decision-making | Ind: Patients<br>Type: Mult / NS<br>Cont: Treatment / symptom management, End-of-life  | Care: Mult / NS<br>HI: Mult / NS<br>Tech: Synchronous telehealth, Email / secure messaging, eHealth, Mobile application, Other (Interactive Voice Response) | MA: No<br>Comp: No<br>Type: Integrative<br>QA: Yes      | No                  |

|                                                                                                                                                                  |                                                                                                                                                                                                                                                                                                                                                           |                                                                                        |                                                                                                                                      |                                                   |                                     |
|------------------------------------------------------------------------------------------------------------------------------------------------------------------|-----------------------------------------------------------------------------------------------------------------------------------------------------------------------------------------------------------------------------------------------------------------------------------------------------------------------------------------------------------|----------------------------------------------------------------------------------------|--------------------------------------------------------------------------------------------------------------------------------------|---------------------------------------------------|-------------------------------------|
| Ayyoubzadeh (2020)<br>Inc: 1999 - 2019<br>N: 15<br>Search: Colorectal cancer + telehealth                                                                        | Purpose: Describe the use of eHealth interventions for colorectal cancer survivors<br>Conclusion: eHealth may provide useful support to colorectal cancer survivors on domains like quality of life, psychological and physical functioning, and quality of life                                                                                          | Ind: Patients<br>Type: Colorectal<br>Cont: Survivorship                                | Care: Mult / NS<br>HI: Mult / NS<br>Tech: Synchronous telehealth, eHealth, Mobile application, Other (wearable devices)              | MA: No<br>Comp: No<br>Type: Systematic<br>QA: No  | Yes<br>(acceptability, feasibility) |
| Badr (2015)<br>Inc: earliest available - 2013<br>N: 8<br>Search: Cancer + psychosocial intervention + caregivers + interactive health communication technologies | Purpose: Describe the use of interactive health communication technologies in dyadic interventions in cancer<br>Conclusion: Limited research has been conducted in this area, with available studies suggesting interactive health communication technologies are feasible and acceptable to patients and caregivers                                      | Ind: Patients, Family<br>Type: Mult / NS<br>Cont: Mult / NS                            | Care: Mult / NS<br>HI: Mult / NS<br>Tech: Synchronous telehealth, eHealth                                                            | MA: No<br>Comp: No<br>Type: Systematic<br>QA: No  | No                                  |
| Bártolo (2019)<br>Inc: 2007 - 2017<br>N: 8<br>Search: Cancer + psychoeducation + distress / quality of life + telehealth                                         | Purpose: Evaluate the effect of psycho-educational telehealth interventions on emotional distress and quality of life in adult cancer patients<br>Conclusion: Evidence was limited, although available data suggests a trend towards reduced distress and improved quality of life for remote interventions with educational and psychological components | Ind: Patients<br>Type: Mult / NS<br>Cont: Treatment / symptom management, Survivorship | Care: Psychosocial support / distress management<br>HI: Mult / NS<br>Tech: Synchronous telehealth, Email / secure messaging, eHealth | MA: No<br>Comp: No<br>Type: Systematic<br>QA: Yes | No                                  |
| Bender (2013)<br>Inc: 1990 - 2012<br>N: 0<br>Search: Cancer + mHealth                                                                                            | Purpose: Describe studies of mobile applications related to cancer<br>Conclusion: There were no studies found that met inclusion criteria                                                                                                                                                                                                                 | Ind: Patients, Family<br>Type: Mult / NS<br>Cont: Mult / NS                            | Care: Mult / NS<br>HI: Mult / NS<br>Tech: Mobile application                                                                         | MA: No<br>Comp: No<br>Type: Systematic<br>QA: No  | No                                  |

|                                                                                                                     |                                                                                                                                                                                                                                                                                                                                                                                                        |                                                                   |                                                                                                                                                   |                                                                                                                                                                                                           |    |
|---------------------------------------------------------------------------------------------------------------------|--------------------------------------------------------------------------------------------------------------------------------------------------------------------------------------------------------------------------------------------------------------------------------------------------------------------------------------------------------------------------------------------------------|-------------------------------------------------------------------|---------------------------------------------------------------------------------------------------------------------------------------------------|-----------------------------------------------------------------------------------------------------------------------------------------------------------------------------------------------------------|----|
| Bhochhibhoya (2021)<br>Inc: 2009 - 2019<br>N: 12<br>Search: Cervical cancer + screening + telehealth                | Purpose: Evaluate efficacy of interventions using mHealth strategies to increase cervical cancer screening<br>Conclusion: Text message and phone call reminders are an acceptable and feasible way to increase cervical cancer screening uptake                                                                                                                                                        | Ind: Patients<br>Type: Gynecologic<br>Cont: Screening / diagnosis | Care: Health behavior change<br>HI: Mult / NS<br>Tech: Synchronous telehealth, Text Messaging / SMS                                               | MA: No<br>Comp: No<br>Type: Scoping<br>QA: Yes                                                                                                                                                            | No |
| Blackwood (2021)<br>Inc: earliest available - 2019<br>N: 5<br>Search: Cancer + physical activity + telehealth       | Purpose: Describe types of technologies used and outcomes of telehealth-delivered physical activity interventions for cancer survivors<br>Conclusion: Limited evidence is available to compare outcomes between telehealth-delivered interventions and traditional home exercise programs among cancer survivors                                                                                       | Ind: Patients<br>Type: Mult / NS<br>Cont: Survivorship            | Care: Health behavior change<br>HI: Mult / NS<br>Tech: Synchronous telehealth, Text messaging / SMS, Mobile application, Other (wearable devices) | MA: No<br>Comp: No<br>Type: Systematic<br>QA: Yes                                                                                                                                                         | No |
| Bouma (2015)<br>Inc: earliest available - 2014<br>N: 16<br>Search: Cancer + psycho-education / support + telehealth | Purpose: Describe the effects of Internet-based support programs on psychosocial and physical symptoms from cancer diagnosis and treatment<br>Conclusion: Internet-based support programs are effective in improving cancer patients' psychosocial and physical symptoms                                                                                                                               | Ind: Patients<br>Type: Mult / NS<br>Cont: Mult / NS               | Care: Mult / NS<br>HI: Mult / NS<br>Tech: Synchronous telehealth, Email / secure messaging, eHealth                                               | MA: No<br>Comp: No<br>Type: Not specified<br>QA: Yes                                                                                                                                                      | No |
| Bracke (2021)<br>Inc: earliest available - 2020<br>N: 3<br>Search: Genetic counseling + telehealth                  | Purpose: Determine whether telephone genetic counseling for BRCA1 and BRCA2 genetic counseling is non-inferior to in-person genetic counseling on cancer-specific distress and knowledge<br>Conclusion: Telephone genetic counseling was non-inferior to in-person genetic counseling on cancer specific distress and genetic knowledge, although further studies are warranted to corroborate results | Ind: Patients<br>Type: Breast, Gynecologic<br>Cont: Prevention    | Care: Medical decision making<br>HI: Healthcare professional<br>Tech: Synchronous telehealth                                                      | MA: Yes<br>Comp: Yes: In-person<br>Type: Systematic<br>QA: Yes<br>MA Out: Telephone interventions non-inferior to in-person for both evaluated outcomes of cancer-specific distress and genetic knowledge | No |

|                                                                                                             |                                                                                                                                                                                                                                                                                    |                                                                       |                                                                                                                                                      |                                                                                                                                                                                                                                                                                                                                                                                                                                |                   |
|-------------------------------------------------------------------------------------------------------------|------------------------------------------------------------------------------------------------------------------------------------------------------------------------------------------------------------------------------------------------------------------------------------|-----------------------------------------------------------------------|------------------------------------------------------------------------------------------------------------------------------------------------------|--------------------------------------------------------------------------------------------------------------------------------------------------------------------------------------------------------------------------------------------------------------------------------------------------------------------------------------------------------------------------------------------------------------------------------|-------------------|
| Bruce (2018)<br>Inc: 2000 - 2015<br>N: 16<br>Search: Skin lesions + Teledermoscopy                          | Purpose: Describe the use and accuracy of teledermoscopy in identifying skin lesions among adults<br>Conclusion: A higher level of evidence is needed to support the application of teledermoscopy for accurate diagnostic measurement of pre-cancerous and cancerous skin lesions | Ind: Patients<br>Type: Skin / Melanoma<br>Cont: Screening / diagnosis | Care: Disease detection or management<br>HI: Mult / NS<br>Tech: Synchronous telehealth, Mobile application, Other (Store-and-forward image transfer) | MA: No<br>Comp: No<br>Type: Systematic<br>QA: No                                                                                                                                                                                                                                                                                                                                                                               | Yes (feasibility) |
| Bu (2022)<br>Inc: earliest available - 2021<br>N: 12<br>Search: Breast cancer + virtual reality             | Purpose: Evaluate the effectiveness of virtual reality interventions on health-related outcomes of breast cancer survivors<br>Conclusion: There were weak but consistently positive impacts of virtual reality interventions on breast cancer survivors' rehabilitation management | Ind: Patients<br>Type: Breast<br>Cont: Mult / NS                      | Care: Mult / NS<br>HI: Mult / NS<br>Tech: Other (Virtual reality)                                                                                    | MA: Yes (article subset)<br>Comp: No* (meta-analysis only of included trials with any control)<br>Type: Systematic<br>QA: Yes<br>MA Out: Virtual reality interventions showed positive impacts on shoulder range-of-motion outcomes (flexion, extension, abduction, adduction, internal rotation, and external rotation), anxiety, depression, pain, and cognitive function, but no differential impact on hand grip strength. | No                |
| Buneviciene (2021)<br>Inc: earliest available - 2019<br>N: 25<br>Search: Cancer + quality of life + mHealth | Purpose: Evaluate the impact of mHealth interventions on health-related quality of life of cancer patients<br>Conclusion: mHealth interventions showed a positive impact on cancer patients' health-related quality of life                                                        | Ind: Patients<br>Type: Mult / NS<br>Cont: Mult / NS                   | Care: Mult / NS<br>HI: Mult / NS<br>Tech: eHealth, Mobile application, Other (wearable devices)                                                      | MA: Yes (article subset)<br>Comp: Yes: Any<br>Type: Systematic<br>QA: Yes<br>MA Out: mHealth interventions produced greater improvements in health-related quality of life relative to control                                                                                                                                                                                                                                 | No                |

|                                                                                                                                  |                                                                                                                                                                                                                                                                                                                         |                                                                          |                                                                                                                                                                                                                                                |                                                                                                                                                                                                  |                                            |
|----------------------------------------------------------------------------------------------------------------------------------|-------------------------------------------------------------------------------------------------------------------------------------------------------------------------------------------------------------------------------------------------------------------------------------------------------------------------|--------------------------------------------------------------------------|------------------------------------------------------------------------------------------------------------------------------------------------------------------------------------------------------------------------------------------------|--------------------------------------------------------------------------------------------------------------------------------------------------------------------------------------------------|--------------------------------------------|
| Cai (2021)<br>Inc: 2010 - 2020<br>N: 8<br>Search: Breast cancer + intervention + mobile application                              | Purpose: Describe studies of the development of mHealth apps for patients with breast cancer<br>Conclusion: Collaboration with patients and providers, as well as patient characteristics, needs, and patient-reported outcomes, are vital components for developing mHealth apps for breast cancer patients            | Ind: Patients<br>Type: Breast<br>Cont: Mult / NS                         | Care: Mult / NS<br>HI: Mult / NS<br>Tech: Mobile application                                                                                                                                                                                   | MA: No<br>Comp: No<br>Type: Scoping<br>QA: No*                                                                                                                                                   | No                                         |
| Cazeau (2021)<br>Inc: 2013 - 2020<br>N: 11<br>Search: Cancer + mHealth + medication adherence                                    | Purpose: Evaluate efficacy of mobile health interventions for medication adherence in cancer<br>Conclusion: Mobile health interventions for medication adherence in cancer tend to be acceptable to patients and may improve outcomes among those at highest risk for suboptimal adherence                              | Ind: Patients<br>Type: Mult / NS<br>Cont: Treatment / symptom management | Care: Health behavior change<br>HI: Mult / NS<br>Tech: Text messaging / SMS, Mobile application, Other (Automated phone calls)                                                                                                                 | MA: No<br>Comp: No<br>Type: Not specified<br>QA: No*                                                                                                                                             | Yes (acceptability, feasibility, fidelity) |
| Chandeying (2021)<br>Inc: earliest available - 2021<br>N: 13<br>Search: Cancer + adolescent / young adult + online interventions | Purpose: Evaluate the effectiveness of online interventions on the mental health of pediatric, adolescent, and young adult cancer survivors<br>Conclusion: Online interventions improved sleep and well-being among pediatric, adolescent, and young adult survivors, but not for reducing depression, anxiety, or pain | Ind: Patients<br>Type: Mult / NS<br>Cont: Mult / NS                      | Care: Health behavior change, Psychosocial support / distress management<br>HI: Mult / NS<br>Tech: Synchronous telehealth, Text messaging / SMS, Email / secure messaging, eHealth, Mobile application, Other (wearable devices, social media) | MA: Yes<br>Comp: Yes: Any<br>Type: Systematic<br>QA: Yes<br>MA Out: Online interventions showed a positive impact on sleep and psychological well-being, but not on depression, anxiety, or pain | No                                         |

|                                                                                                                                             |                                                                                                                                                                                                                                                                                                                                   |                                                     |                                                                                                                                                                                                            |                                                                                                                                                                                                                                                                        |    |
|---------------------------------------------------------------------------------------------------------------------------------------------|-----------------------------------------------------------------------------------------------------------------------------------------------------------------------------------------------------------------------------------------------------------------------------------------------------------------------------------|-----------------------------------------------------|------------------------------------------------------------------------------------------------------------------------------------------------------------------------------------------------------------|------------------------------------------------------------------------------------------------------------------------------------------------------------------------------------------------------------------------------------------------------------------------|----|
| Chen (2018)<br>Inc: earliest available - 2016<br>N: 20<br>Search: Breast cancer + RCT + telehealth                                          | Purpose: Evaluate the effect of telehealth interventions on quality of life and psychological outcomes in breast cancer<br>Conclusion: Telehealth had superior outcomes to usual care on quality of life, self-efficacy, depression, distress, and stress, but not anxiety                                                        | Ind: Patients<br>Type: Breast<br>Cont: Mult / NS    | Care: Mult / NS<br>HI: Mult / NS<br>Tech: Synchronous telehealth, Email / secure messaging, eHealth                                                                                                        | MA: Yes<br>Comp: Yes: Usual Care<br>Type: Systematic<br>QA: Yes<br>MA Out: Telehealth intervention was associated with reduced depression (limitation by sensitivity analysis), distress, and perceived stress, and increased self-efficacy; but no effect for anxiety | No |
| Cheng (2022)<br>Inc: earliest available - 2020<br>N: 16<br>Search: Cancer + adolescent / young adult + qualitative methods + digital health | Purpose: Identify, appraise, and synthesize qualitative data about pediatric cancer patients' experiences with digital health interventions<br>Conclusion: Digital health interventions were found to be largely acceptable and convenient ways to deliver care to pediatric cancer patients, although challenges were also noted | Ind: Patients<br>Type: Mult / NS<br>Cont: Mult / NS | Care: Mult / NS<br>HI: Mult / NS<br>Tech: Text messaging / SMS, eHealth, Mobile application, Other (Virtual reality, Wearable devices)                                                                     | MA: No<br>Comp: No<br>Type: Systematic<br>QA: Yes                                                                                                                                                                                                                      | No |
| Cheng (2021)<br>Inc: earliest available - 2019<br>N: 11<br>Search: Adolescent young adult + cancer + symptoms + telehealth                  | Purpose: Evaluate the effect of digital health technologies on symptom management across the pediatric cancer continuum<br>Conclusion: Evidence was mixed and inconclusive, though there was a trend for stronger effects for interventions with more interactivity.                                                              | Ind: Patients<br>Type: Mult / NS<br>Cont: Mult / NS | Care: Disease detection or management<br>HI: Mult / NS<br>Tech: Synchronous telehealth, Text messaging / SMS, eHealth, Mobile application, Other (Virtual reality, social humanoid robot-assisted therapy) | MA: No<br>Comp: No<br>Type: Systematic<br>QA: No                                                                                                                                                                                                                       | No |

|                                                                                                 |                                                                                                                                                                                                                                                                                                                 |                                                                          |                                                                                                                                                                                                    |                                                         |                                                      |
|-------------------------------------------------------------------------------------------------|-----------------------------------------------------------------------------------------------------------------------------------------------------------------------------------------------------------------------------------------------------------------------------------------------------------------|--------------------------------------------------------------------------|----------------------------------------------------------------------------------------------------------------------------------------------------------------------------------------------------|---------------------------------------------------------|------------------------------------------------------|
| Chirico (2016)<br>Inc: 1993 - 2013<br>N: 19<br>Search: Cancer + virtual reality                 | Purpose: Describe studies testing virtual reality interventions with cancer patients<br>Conclusion: Virtual reality intervention studies have shown positive impact on patients' emotional well-being and distress                                                                                              | Ind: Patients<br>Type: Mult / NS<br>Cont: Treatment / symptom management | Care: Psychosocial support / distress management<br>HI: Mult / NS<br>Tech: Other (Virtual reality)                                                                                                 | MA: No<br>Comp: No<br>Type: Systematic<br>QA: No        | No                                                   |
| Cho (2021)<br>Inc: 2010 - 2020<br>N: 33<br>Search: Cancer + symptom self-reporting + technology | Purpose: Describe acceptance and use of home-based electronic symptom self-reporting systems by patients with cancer<br>Conclusion: Acceptance and use of home-based electronic symptom self-reporting systems varied, and lack of access to technology is a barrier to adopting these systems                  | Ind: Patients<br>Type: Mult / NS<br>Cont: Treatment / symptom management | Care: Disease detection or management<br>HI: Mult / NS<br>Tech: Text messaging / SMS, eHealth, Mobile application, Other (Electronic Health Records / Patient portals; Interactive Voice Response) | MA: No<br>Comp: No<br>Type: Systematic<br>QA: No        | Yes<br>(acceptability, feasibility)                  |
| Choi (2018)<br>Inc: 2007 - 2017<br>N: 18<br>Search: Skin cancer + mHealth                       | Purpose: Describe the use of mHealth across the skin cancer continuum<br>Conclusion: Studies have used mHealth approaches to skin cancer prevention and evaluated diagnostic accuracy and feasibility, but not all phases of skin cancer have been addressed                                                    | Ind: Patients<br>Type: Skin / Melanoma<br>Cont: Mult / NS                | Care: Health behavior change, Disease detection or management<br>HI: Mult / NS<br>Tech: Text messaging / SMS, Email / secure messaging, Mobile application                                         | MA: No<br>Comp: No<br>Type: Systematic<br>QA: No        | Yes<br>(acceptability, appropriateness, feasibility) |
| Chow (2021)<br>Inc: 1999 - 2019<br>N: 9<br>Search: Pain OR anxiety + virtual reality            | Purpose: Evaluate impact of virtual reality on pain and/or anxiety outcomes in cancer patients undergoing procedures and to identify limitations in the literature<br>Conclusion: Evidence is inconclusive that virtual reality interventions impact cancer patients' pain or anxiety during medical procedures | Ind: Patients<br>Type: Mult / NS<br>Cont: Treatment / symptom management | Care: Psychosocial support / distress management<br>HI: Mult / NS<br>Tech: Other (Virtual reality)                                                                                                 | MA: No<br>Comp: Yes: Any<br>Type: Systematic<br>QA: Yes | No                                                   |

|                                                                                                                                                  |                                                                                                                                                                                                                                                                                                                                                                                             |                                                        |                                                                                                                                       |                                                    |                                            |
|--------------------------------------------------------------------------------------------------------------------------------------------------|---------------------------------------------------------------------------------------------------------------------------------------------------------------------------------------------------------------------------------------------------------------------------------------------------------------------------------------------------------------------------------------------|--------------------------------------------------------|---------------------------------------------------------------------------------------------------------------------------------------|----------------------------------------------------|--------------------------------------------|
| Christopherson (2022)<br>Inc: earliest available - 2020<br>N: 6<br>Search: Cancer + exercise + videoconferencing / video games / virtual reality | Purpose: Evaluate the effect of video games and videoconferencing physical activity interventions for adolescent young adult cancer survivors<br>Conclusion: Although video games and videoconferencing physical activity interventions show promise for improving quality of life and fatigue, more rigorous studies targeting adolescent young adult survivors specifically are necessary | Ind: Patients<br>Type: Mult / NS<br>Cont: Mult / NS    | Care: Health behavior change<br>HI: Mult / NS<br>Tech: Synchronous telehealth, Other (video games)                                    | MA: No<br>Comp: No<br>Type: Systematic<br>QA: No   | No                                         |
| Coughlin (2016)<br>Inc: earliest available - 2015<br>N: 6<br>Search: Cancer prevention + smartphone                                              | Purpose: Describe mobile applications for preventing cancer through healthy lifestyle behavior modification<br>Conclusion: Four trials of applications for smoking cessation and two from sun safety were identified; further research is needed to establish the capabilities of apps for cancer prevention                                                                                | Ind: Patients<br>Type: Mult / NS<br>Cont: Prevention   | Care: Health behavior change<br>HI: Mult / NS<br>Tech: Mobile application                                                             | MA: No<br>Comp: No<br>Type: Exploratory<br>QA: No* | No                                         |
| Cox (2017)<br>Inc: 2006 - 2016<br>N: 22<br>Search: Cancer survivors + survivor experience + eHealth                                              | Purpose: Identify, appraise, and synthesize qualitative data about adult cancer patients' experiences with telehealth interventions<br>Conclusion: Telehealth interventions can provide cancer patients convenient and personalized care and reassurance                                                                                                                                    | Ind: Patients<br>Type: Mult / NS<br>Cont: Mult / NS    | Care: Mult / NS<br>HI: Healthcare professional<br>Tech: Synchronous telehealth, Email / secure messaging, eHealth, Mobile application | MA: No<br>Comp: No<br>Type: Systematic<br>QA: No   | No                                         |
| Curry (2021)<br>Inc: earliest available - 2020<br>N: 8<br>Search: Lung cancer + Internet                                                         | Purpose: Evaluate the feasibility, acceptability, and potential efficacy of online supportive care interventions for lung cancer patients and survivors<br>Conclusion: Most studies were small, but preliminary evidence suggests online supportive care interventions among lung cancer patients and survivors are feasible and acceptable                                                 | Ind: Patients, Family<br>Type: Lung<br>Cont: Mult / NS | Care: Mult / NS<br>HI: Mult / NS<br>Tech: Synchronous telehealth, eHealth, Mobile application                                         | MA: No<br>Comp: No<br>Type: Systematic<br>QA: Yes  | Yes (acceptability, feasibility, fidelity) |



|                                                                                                                                |                                                                                                                                                                                                                                                                                                                                                                                                                                      |                                                                                        |                                                                                                                              |                                                  |                                        |
|--------------------------------------------------------------------------------------------------------------------------------|--------------------------------------------------------------------------------------------------------------------------------------------------------------------------------------------------------------------------------------------------------------------------------------------------------------------------------------------------------------------------------------------------------------------------------------|----------------------------------------------------------------------------------------|------------------------------------------------------------------------------------------------------------------------------|--------------------------------------------------|----------------------------------------|
| Darley (2021)<br>Inc: 2005 - 2021<br>N: 28<br>Search: Cancer + experience + eHealth                                            | Purpose: Synthesize qualitative evidence regarding experiences of people with cancer and their family caregivers using eHealth technology<br>Conclusion: Patients and caregivers appreciated the role of eHealth in their cancer care, particularly for providing personalized information around the time of diagnosis and treatment                                                                                                | Ind: Patients, Family<br>Type: Mult / NS<br>Cont: Mult / NS                            | Care: Mult / NS<br>HI: Mult / NS<br>Tech: Synchronous telehealth, eHealth, Mobile application                                | MA: No<br>Comp: No<br>Type: Narrative<br>QA: Yes | No                                     |
| de Queiroz (2021)<br>Inc: 2010 - 2020<br>N: 121 (analysis 1) / 15 (analysis 2)<br>Search: Cancer + self-management + wearables | Purpose: Describe applications and benefits of using Internet of Things techniques - particularly wearable devices - on symptom management, quality of life, and survival in cancer patients undergoing treatment<br>Conclusion: Interventions utilizing Internet of Things techniques contributed positively to the monitoring of cancer patients, improving their quality of life and managing adverse effects of cancer treatment | Ind: Patients<br>Type: Mult / NS<br>Cont: Treatment / symptom management               | Care: Mult / NS<br>HI: Mult / NS<br>Tech: Synchronous telehealth, eHealth, Mobile application, Other (wearable devices)      | MA: No<br>Comp: No<br>Type: Systematic<br>QA: No | Yes (feasibility, fidelity)            |
| Delemere (2021)<br>Inc: earliest available - 2020<br>N: 16<br>Search: Cancer + Pediatric + telehealth + family                 | Purpose: Describe connected health for supporting family members of pediatric cancer patients<br>Conclusion: Connected health interventions hold significant potential to support families affected by pediatric cancer, but studies with more robust designs are needed.                                                                                                                                                            | Ind: Family<br>Type: Mult / NS<br>Cont: Mult / NS                                      | Care: Mult / NS<br>HI: Mult / NS<br>Tech: Synchronous telehealth, eHealth, Mobile application                                | MA: No<br>Comp: No<br>Type: Systematic<br>QA: No | Yes (acceptability, feasibility)       |
| Dickinson (2014)<br>Inc: 2000 - 2014<br>N: 17<br>Search: Cancer + follow-up care + telehealth                                  | Purpose: Evaluate clinical safety, acceptability, cost effectiveness, and impact on quality of life of telehealth-delivered follow-up cancer care<br>Conclusion: Evidence suggests telehealth for follow-up cancer care is clinically safe and acceptable, but there is insufficient evidence regarding its cost-effectiveness                                                                                                       | Ind: Patients<br>Type: Mult / NS<br>Cont: Treatment / symptom management, Survivorship | Care: Mult / NS<br>HI: Mult / NS<br>Tech: Synchronous telehealth, eHealth, Mobile application, Other (Automated phone calls) | MA: No<br>Comp: No<br>Type: Systematic<br>QA: No | Yes (acceptability, feasibility, cost) |

|                                                                                                                    |                                                                                                                                                                                                                                                                                                                              |                                                                                        |                                                                                                                                                                                      |                                                                                                                                                                                                  |                                            |
|--------------------------------------------------------------------------------------------------------------------|------------------------------------------------------------------------------------------------------------------------------------------------------------------------------------------------------------------------------------------------------------------------------------------------------------------------------|----------------------------------------------------------------------------------------|--------------------------------------------------------------------------------------------------------------------------------------------------------------------------------------|--------------------------------------------------------------------------------------------------------------------------------------------------------------------------------------------------|--------------------------------------------|
| Dorri (2020)<br>Inc: earliest available - 2018<br>N: 16<br>Search: Breast cancer + physical activity + eHealth     | Purpose: Evaluate the efficacy of eHealth physical activity interventions for breast cancer patients<br>Conclusion: eHealth interventions can improve physical activity in breast cancer patients, but there is a need for interventions tailored to breast cancer specifically                                              | Ind: Patients<br>Type: Breast<br>Cont: Treatment / symptom management                  | Care: Health behavior change<br>HI: Mult / NS<br>Tech: eHealth, Mobile application                                                                                                   | MA: No<br>Comp: No<br>Type: Systematic<br>QA: No                                                                                                                                                 | No                                         |
| Elepaño (2021)<br>Inc: earliest available - 2020<br>N: 10<br>Search: Colorectal cancer + screening + mHealth       | Purpose: Compare the efficacy of mHealth interventions with standard care for increasing colorectal cancer screening rates<br>Conclusion: The use of mHealth interventions is associated with greater colorectal cancer screening uptake relative to standard care, across different types of interventions                  | Ind: Patients<br>Type: Colorectal<br>Cont: Screening / diagnosis                       | Care: Health behavior change<br>HI: Mult / NS<br>Tech: Synchronous telehealth, Text messaging / SMS                                                                                  | MA: Yes<br>Comp: Yes: Usual Care<br>Type: Systematic<br>QA: Yes<br>MA Out: mHealth interventions were associated with greater rates of colorectal screening participation relative to usual care | No                                         |
| Escriva Bouley (2018)<br>Inc: earliest available - 2017<br>N: 29<br>Search: Cancer + intervention + digital health | Purpose: Describe digital health interventions for cancer patients, engagement with these interventions, and effects on psychosocial variables<br>Conclusion: Results were inconsistent due to study heterogeneity, although studies suggested digital interventions could help patients and survivors cope with the disease | Ind: Patients<br>Type: Mult / NS<br>Cont: Treatment / symptom management, Survivorship | Care: Mult / NS<br>HI: Mult / NS<br>Tech: Synchronous telehealth, Text messaging / SMS, eHealth, Mobile application                                                                  | MA: No<br>Comp: No<br>Type: Systematic<br>QA: No                                                                                                                                                 | Yes (acceptability, feasibility, fidelity) |
| Ester (2021)<br>Inc: earliest available - 2021<br>N: 71<br>Search: Cancer + exercise + eHealth                     | Purpose: Describe up-to-date evidence on eHealth physical activity interventions for adults with cancer<br>Conclusion: eHealth interventions can increase physical activity among adult cancer patients, with specific components linked with greater effectiveness                                                          | Ind: Patients<br>Type: Mult / NS<br>Cont: Mult / NS                                    | Care: Health behavior change<br>HI: Mult / NS<br>Tech: Synchronous telehealth, Text messaging / SMS, Email / secure messaging, eHealth, Mobile application, Other (wearable devices) | MA: No<br>Comp: No<br>Type: Systematic<br>QA: Yes                                                                                                                                                | No                                         |

|                                                                                                                                                    |                                                                                                                                                                                                                                                                                                                                                 |                                                                       |                                                                                                                                                |                                                    |                                                  |
|----------------------------------------------------------------------------------------------------------------------------------------------------|-------------------------------------------------------------------------------------------------------------------------------------------------------------------------------------------------------------------------------------------------------------------------------------------------------------------------------------------------|-----------------------------------------------------------------------|------------------------------------------------------------------------------------------------------------------------------------------------|----------------------------------------------------|--------------------------------------------------|
| Finch (2016)<br>Inc: 2001 - 2015<br>N: 8<br>Search: Skin cancer + mobile phone                                                                     | Purpose: Evaluate available literature using text messaging and mHealth interventions for skin cancer prevention<br>Conclusion: Self-reported behavioral changes are promising, but there is a lack of evidence of impact on objective measures (e.g., sunburn)                                                                                 | Ind: Patients<br>Type: Skin / Melanoma<br>Cont: Prevention            | Care: Health behavior change<br>HI: Mult / NS<br>Tech: Text messaging / SMS, Mobile application, Email / secure messaging                      | MA: No<br>Comp: No<br>Type: Systematic<br>QA: No   | No                                               |
| Finnane (2017)<br>Inc: 2009 - 2017<br>N: 21<br>Search: Skin cancer + teledermatology                                                               | Purpose: Compare accuracy and patient/clinician time between teledermatology and usual care, and describe enablers and barriers to teledermatology adoption<br>Conclusion: Accuracy of face-to-face diagnosis is generally higher than teledermatology; however, teledermatology reduced wait time and generally had high patient satisfaction. | Ind: Patients<br>Type: Skin / Melanoma<br>Cont: Screening / diagnosis | Care: Disease detection or management<br>HI: Healthcare professional<br>Tech: Synchronous telehealth, Other (store-and-forward image transfer) | MA: No<br>Comp: No<br>Type: Systematic<br>QA: No   | Yes (acceptability)                              |
| Forbes (2019)<br>Inc: earliest available - 2017<br>N: 16<br>Search: Prostate cancer + intervention evaluation + supportive care outcomes + eHealth | Purpose: Evaluate the feasibility, acceptability, and efficacy of online supportive care interventions for prostate cancer survivors<br>Conclusion: Preliminary evidence supports the use of online supportive care among prostate cancer survivors, but more robust evidence is needed                                                         | Ind: Patients<br>Type: Prostate<br>Cont: Mult / NS                    | Care: Mult / NS<br>HI: Mult / NS<br>Tech: Synchronous telehealth, eHealth                                                                      | MA: No<br>Comp: No<br>Type: Systematic<br>QA: Yes  | Yes (acceptability, feasibility, fidelity, cost) |
| Fournier (2018)<br>Inc: 2011 - 2016<br>N: 7<br>Search: Cancer + genetic counseling + telehealth                                                    | Purpose: Evaluate the efficacy of delivering genetic counseling for breast and ovarian cancer by telephone and telehealth<br>Conclusion: Knowledge, distress, and satisfaction were equivalent between in-person and telehealth counseling; testing was higher among in-person, but convenience was greater and cost was lower for telehealth   | Ind: Patients<br>Type: Breast, Gynecologic<br>Cont: Prevention        | Care: Medical decision making<br>HI: Mult / NS<br>Tech: Synchronous telehealth                                                                 | MA: No<br>Comp: No<br>Type: Integrative<br>QA: No* | Yes (acceptability, cost)                        |

|                                                                                                                                                |                                                                                                                                                                                                                                                                                                                                                      |                                                                       |                                                                                                                                |                                                                                                                                                                                                                                |    |
|------------------------------------------------------------------------------------------------------------------------------------------------|------------------------------------------------------------------------------------------------------------------------------------------------------------------------------------------------------------------------------------------------------------------------------------------------------------------------------------------------------|-----------------------------------------------------------------------|--------------------------------------------------------------------------------------------------------------------------------|--------------------------------------------------------------------------------------------------------------------------------------------------------------------------------------------------------------------------------|----|
| Freeman (2020)<br>Inc: earliest available - 2019<br>N: 9<br>Search: Skin cancer + mHealth                                                      | Purpose: Evaluate studies examining the accuracy of algorithm-based smartphone applications to assess risk of skin cancer from suspicious skin lesions<br>Conclusion: Current algorithm-based smartphone applications cannot be relied on detect all cases of skin cancer                                                                            | Ind: Patients<br>Type: Skin / Melanoma<br>Cont: Screening / diagnosis | Care: Disease detection or management<br>HI: None- fully-automated<br>Tech: Mobile application                                 | MA: No<br>Comp: No<br>Type: Systematic<br>QA: Yes                                                                                                                                                                              | No |
| Fridriksdottir (2018)<br>Inc: earliest available - 2021<br>N: 20<br>Search: Cancer + symptom management + randomized clinical trial + Internet | Purpose: Describe the effect of web-based interventions on cancer patients' symptoms<br>Conclusion: Web-based interventions have promise to feasibly address cancer symptom management                                                                                                                                                               | Ind: Patients<br>Type: Mult / NS<br>Cont: Mult / NS                   | Care: Mult / NS<br>HI: Mult / NS<br>Tech: Synchronous telehealth, Email / secure messaging, eHealth, Mobile application        | MA: No<br>Comp: Yes: Any<br>Type: Narrative systematic<br>QA: Yes                                                                                                                                                              | No |
| Fung (2022)<br>Inc: 2005 - 2020<br>N: 18<br>Search: Cancer + mindfulness-based meditation + eHealth                                            | Purpose: Describe the effectiveness of eHealth mindfulness-based interventions on anxiety, depression, mindfulness, and quality of life among cancer patients and survivors<br>Conclusion: eHealth mindfulness-based interventions led to small reductions in anxiety and depression; positive effects on quality of life and mindfulness were mixed | Ind: Patients<br>Type: Mult / NS<br>Cont: Mult / NS                   | Care: Psychosocial support / distress management<br>HI: Mult / NS<br>Tech: Synchronous telehealth, eHealth, Mobile application | MA: Yes<br>Comp: Yes: Any<br>Type: Systematic<br>QA: Yes<br>MA Out: eHealth mindfulness-based interventions showed small positive effects for anxiety and depression; there were no effects for quality of life or mindfulness | No |

|                                                                                                                |                                                                                                                                                                                                                                                                                                                                                      |                                                                                       |                                                                                                                                                                                           |                                                                                                                                                                                                                                                                                                                                   |                                       |
|----------------------------------------------------------------------------------------------------------------|------------------------------------------------------------------------------------------------------------------------------------------------------------------------------------------------------------------------------------------------------------------------------------------------------------------------------------------------------|---------------------------------------------------------------------------------------|-------------------------------------------------------------------------------------------------------------------------------------------------------------------------------------------|-----------------------------------------------------------------------------------------------------------------------------------------------------------------------------------------------------------------------------------------------------------------------------------------------------------------------------------|---------------------------------------|
| Furness (2020)<br>Inc: 2007 - 2019<br>N: 24<br>Search: Health behavior change + telehealth                     | Purpose: Evaluate the efficacy of eHealth behavior change interventions for cancer patients and survivors<br>Conclusion: Physical activity and dietary eHealth interventions have a small to moderate impact on cancer patient and survivor behavior change; there is insufficient evidence to compare synchronous and asynchronous delivery methods | Ind: Patients<br>Type: Mult / NS<br>Cont: Mult / NS                                   | Care: Health behavior change<br>HI: Mult / NS<br>Tech: Synchronous telehealth, Text messaging / SMS, Email / secure messaging, eHealth, Mobile application, Other (automated phone calls) | MA: Yes<br>Comp: Yes: Any<br>Type: Systematic<br>QA: Yes<br>MA Out: eHealth interventions largely showed favorable outcomes relative to control for physical activity and dietary behavior change, quality of life, fatigue, depression, and anxiety (outcomes differed by assessment schedule and type of intervention delivery) | Yes (adoption, feasibility, fidelity) |
| Gambalunga (2021)<br>Inc: earliest available - 2018<br>N: 7<br>Search: Cancer + medication adherence + mHealth | Purpose: Describe mobile health interventions for promoting adherence to oral cancer therapies<br>Conclusion: Existing studies were insufficient to determine the efficacy of mobile health interventions for promoting adherence to oral cancer therapies                                                                                           | Ind: Patients<br>Type: Mult / NS<br>Cont: Treatment / symptom management              | Care: Disease detection or management<br>HI: Mult / NS<br>Tech: Text messaging / SMS, Mobile application                                                                                  | MA: No<br>Comp: No<br>Type: Scoping<br>QA: No*                                                                                                                                                                                                                                                                                    | No                                    |
| Goodman (2022)<br>Inc: earliest available - 2020<br>N: 40<br>Search: Cancer + palliative care + telehealth     | Purpose: Characterize the engagement of people with advanced cancer with telehealth interventions<br>Conclusion: There was a proportional relationship between engagement and intervention intensity; higher engagement occurred when delivered by tablet, computer, or smartphone app                                                               | Ind: Patients<br>Type: Mult / NS<br>Cont: Treatment / symptom monitoring, End-of-life | Care: Mult / NS<br>HI: Mult / NS<br>Tech: Synchronous telehealth, Text messaging / SMS, Email / secure messaging, eHealth, Mobile application                                             | MA: No<br>Comp: No<br>Type: Systematic<br>QA: Yes                                                                                                                                                                                                                                                                                 | Yes (adoption, fidelity)              |

|                                                                                                                                                                                 |                                                                                                                                                                                                                                                                                                                                                                                                             |                                                                        |                                                                                                              |                                                   |                                                             |
|---------------------------------------------------------------------------------------------------------------------------------------------------------------------------------|-------------------------------------------------------------------------------------------------------------------------------------------------------------------------------------------------------------------------------------------------------------------------------------------------------------------------------------------------------------------------------------------------------------|------------------------------------------------------------------------|--------------------------------------------------------------------------------------------------------------|---------------------------------------------------|-------------------------------------------------------------|
| Haberlin (2018)<br>Inc: earliest available - 2017<br>N: 10<br>Search: Cancer + physical activity + telehealth                                                                   | Purpose: Evaluate the efficacy of eHealth interventions to promote physical activity in cancer survivors<br>Conclusion: eHealth interventions can improve physical activity in cancer survivors                                                                                                                                                                                                             | Ind: Patients<br>Type: Mult / NS<br>Cont: Survivorship                 | Care: Health behavior change<br>HI: Mult / NS<br>Tech: Email / secure messaging, eHealth, Mobile application | MA: No<br>Comp: No<br>Type: Systematic<br>QA: Yes | No                                                          |
| Han (2018)<br>Inc: 1997-2017<br>N: 18<br>Search: Cancer + social media                                                                                                          | Purpose: Review studies of research on interventions using social media in cancer care<br>Conclusion: Interventions using social media have potential benefit to cancer prevention and management as they were largely acceptable, feasible, and potentially efficacious                                                                                                                                    | Ind: Patients, Family<br>Type: Mult / NS<br>Cont: Mult / NS            | Care: Mult / NS<br>HI: Mult / NS<br>Tech: Other (Social media)                                               | MA: No<br>Comp: No<br>Type: Systematic<br>QA: Yes | Yes (feasibility, cost)                                     |
| Hernandez Silva (2019)<br>Inc: earliest available - 2017<br>N: 7<br>Search: Cancer survivors + pain, psychological distress, fatigue, and/or sleep + mobile health applications | Purpose: Evaluate the effectiveness of mHealth applications for self-management of pain, psychological distress, fatigue, or sleep outcomes in adult cancer survivors<br>Conclusion: Emerging evidence supports that self-management mHealth interventions can improve pain and fatigue outcomes in cancer survivors, and there is some promise for their use for psychological distress and sleep outcomes | Ind: Patients<br>Type: Mult / NS<br>Cont: Mult / NS                    | Care: Mult / NS<br>HI: Mult / NS<br>Tech: Mobile application                                                 | MA: No<br>Comp: No<br>Type: Systematic<br>QA: Yes | Yes (acceptability, adoption, feasibility, fidelity)        |
| Heynsbergh (2018)<br>Inc: 2007 - 2017<br>N: 6<br>Search: Cancer + Caregiver + e/mHealth                                                                                         | Purpose: Evaluate the feasibility, usability, and acceptability of technology-based interventions for carers of people with cancer<br>Conclusion: Interventions were generally feasible based on attrition rates and generally found to be acceptable, although usability varied                                                                                                                            | Ind: Family<br>Type: Mult / NS<br>Cont: Treatment / symptom management | Care: Psychosocial support / distress management<br>HI: Mult / NS<br>Tech: eHealth, Mobile application       | MA: No<br>Comp: No<br>Type: Systematic<br>QA: Yes | Yes (acceptability, appropriateness, feasibility, fidelity) |

|                                                                                                                                           |                                                                                                                                                                                                                                                                                                                                                |                                                                                   |                                                                                                                                         |                                                                                                                                                                                                                                                                             |                                                   |
|-------------------------------------------------------------------------------------------------------------------------------------------|------------------------------------------------------------------------------------------------------------------------------------------------------------------------------------------------------------------------------------------------------------------------------------------------------------------------------------------------|-----------------------------------------------------------------------------------|-----------------------------------------------------------------------------------------------------------------------------------------|-----------------------------------------------------------------------------------------------------------------------------------------------------------------------------------------------------------------------------------------------------------------------------|---------------------------------------------------|
| Hong, H. (2021)<br>Inc: earliest available - 2019<br>N: 8<br>Search: Childhood cancer survivors + self-management + digital interventions | Purpose: Evaluate the evidence regarding digital interventions for childhood cancer survivors on health outcomes<br>Conclusion: There are inconsistent results from digital interventions on improving health outcomes for childhood cancer survivors                                                                                          | Ind: Patients<br>Type: Mult / NS<br>Cont: Survivorship                            | Care: Mult / NS<br>HI: Mult / NS<br>Tech: Email / secure messaging, eHealth, Mobile application, Other (wearable devices, social media) | MA: Yes (article subset)<br>Comp: No* (meta-analysis only of included RCTs with any control)<br>Type: Systematic<br>QA: Yes<br>MA Out: Digital self-management interventions were not effective on health-related quality of life or moderate-to-vigorous physical activity | Yes (fidelity)                                    |
| Hong, Y. (2020)<br>Inc: 2000 - 2018<br>N: 13<br>Search: Cancer + patient-provider communication + digital systems                         | Purpose: Describe existing digital interventions to improve communication between cancer patients and survivors and their providers<br>Conclusion: Evidence suggests the preliminary efficacy of digital interventions to improve patient-provider communication in the context of cancer                                                      | Ind: Patients, Family, Healthcare personnel<br>Type: Mult / NS<br>Cont: Mult / NS | Care: Other (patient-provider communication)<br>HI: Mult / NS<br>Tech: Text messaging / SMS, Email / secure messaging, eHealth          | MA: No<br>Comp: No<br>Type: Systematic<br>QA: No                                                                                                                                                                                                                            | No                                                |
| Hopstaken (2021)<br>Inc: 2000 - 2020<br>N: 17<br>Search: Neoplasms + patient portal                                                       | Purpose: Describe the effect of digital care platforms on quality of cancer care, as well as barriers and facilitators to their implementation<br>Conclusion: Digital care platforms increase patients' access to information and enhance their self-efficacy; however, most studies were early-stage and within a specific patient population | Ind: Patients<br>Type: Mult / NS<br>Cont: Mult / NS                               | Care: Mult / NS<br>HI: Mult / NS<br>Tech: Email / secure messaging, eHealth, Other (Electronic health records)                          | MA: No<br>Comp: No<br>Type: Systematic<br>QA: Yes                                                                                                                                                                                                                           | Yes (acceptability, appropriateness, feasibility) |
| Houghton (2019)<br>Inc: earliest available - 2019<br>N: 82<br>Search: Breast cancer + mobile application                                  | Purpose: Describe the use of mobile applications for breast cancer prevention<br>Conclusion: Mobile applications have been studied across the cancer control continuum, although the majority of studies have targeted tertiary prevention                                                                                                     | Ind: Patients<br>Type: Breast<br>Cont: Mult / NS                                  | Care: Mult / NS<br>HI: Mult / NS<br>Tech: Mobile application                                                                            | MA: No<br>Comp: No<br>Type: Systematic<br>QA: No                                                                                                                                                                                                                            | No                                                |

|                                                                                                                               |                                                                                                                                                                                                                                                                                                                                       |                                                                                        |                                                                                                                                                                    |                                                                                                                                      |                                                   |
|-------------------------------------------------------------------------------------------------------------------------------|---------------------------------------------------------------------------------------------------------------------------------------------------------------------------------------------------------------------------------------------------------------------------------------------------------------------------------------|----------------------------------------------------------------------------------------|--------------------------------------------------------------------------------------------------------------------------------------------------------------------|--------------------------------------------------------------------------------------------------------------------------------------|---------------------------------------------------|
| Hwang (2020)<br>Inc: earliest available - 2020<br>N: 15<br>Search: Cancer survivor + occupational health factors + telehealth | Purpose: Describe the evidence regarding use of telehealth interventions for occupational therapy among cancer survivors<br>Conclusion: Telehealth approaches for occupational therapy for cancer survivors has positive therapeutic effects                                                                                          | Ind: Patients<br>Type: Mult / NS<br>Cont: Survivorship                                 | Care: Mult / NS<br>HI: Mult / NS<br>Tech: Synchronous telehealth, eHealth, Mobile application                                                                      | MA: No<br>Comp: No<br>Type: Systematic<br>QA: Yes                                                                                    | Yes<br>(acceptability, appropriateness, fidelity) |
| Ibeggazene (2021)<br>Inc: earliest available - 2020<br>N: 3<br>Search: Cancer + exercise                                      | Purpose: Evaluate the effects of remotely-delivered interventions to improve exercise behavior in sedentary adults living with and beyond cancer<br>Conclusion: Evidence did not support efficacy of remote exercise interventions to improve exercise behavior or physical function in sedentary adults living with or beyond cancer | Ind: Patients<br>Type: Mult / NS<br>Cont: Treatment / symptom management, Survivorship | Care: Health behavior change<br>HI: Mult / NS<br>Tech: Synchronous telehealth, Email / secure messaging                                                            | MA: Yes<br>Comp: Yes: Usual care<br>Type: Systematic<br>QA: Yes<br>MA Out: Interventions produced greater aerobic exercise tolerance | No                                                |
| Janssen (2017)<br>Inc: earliest available - 2016<br>N: 26<br>Search: Cancer + interdisciplinary collaboration + telehealth    | Purpose: Describe how eHealth facilitates interdisciplinary collaboration in cancer care<br>Conclusion: Use of eHealth interventions to support interdisciplinary cancer care was widespread, although most research focused on development of interventions rather than long-term impact                                             | Ind: Patients, Healthcare Personnel<br>Type: Mult / NS<br>Cont: Mult / NS              | Care: Mult / NS<br>HI: Mult / NS<br>Tech: Synchronous telehealth, eHealth, Mobile application, Other (Electronic health records, store-and-forward image transfer) | MA: No<br>Comp: No<br>Type: Integrative<br>QA: No*                                                                                   | No                                                |
| Jongerius (2019)<br>Inc: 2008 - 2018<br>N: 29<br>Search: Breast cancer + mHealth                                              | Purpose: Describe studies on mHealth interventions in breast cancer care<br>Conclusion: Outcomes were generally positive for apps relating to care management and survivorship, but there was less conclusive data on psychological interventions                                                                                     | Ind: Patients<br>Type: Breast<br>Cont: Mult / NS                                       | Care: Mult / NS<br>HI: Mult / NS<br>Tech: Mobile application                                                                                                       | MA: No<br>Comp: No<br>Type: Systematic<br>QA: Yes                                                                                    | No                                                |



|                                                                                                                                     |                                                                                                                                                                                                                                                                                                                                     |                                                                          |                                                                                                                                                 |                                                                                                                                                                                                                                                                           |                             |
|-------------------------------------------------------------------------------------------------------------------------------------|-------------------------------------------------------------------------------------------------------------------------------------------------------------------------------------------------------------------------------------------------------------------------------------------------------------------------------------|--------------------------------------------------------------------------|-------------------------------------------------------------------------------------------------------------------------------------------------|---------------------------------------------------------------------------------------------------------------------------------------------------------------------------------------------------------------------------------------------------------------------------|-----------------------------|
| Kaltenbaugh (2015)<br>Inc: earliest available - 2014<br>N: 6<br>Search: Cancer + caregivers + web-based                             | Purpose: Describe literature on web-based interventions for caregivers of people with cancer<br>Conclusion: Web-based caregiver interventions may positively impact cancer caregivers through provision of information and support                                                                                                  | Ind: Family<br>Type: Mult / NS<br>Cont: Mult / NS                        | Care: Mult / NS<br>HI: Mult / NS<br>Tech: Email / secure messaging, eHealth                                                                     | MA: No<br>Comp: No<br>Type: Systematic<br>QA: Yes                                                                                                                                                                                                                         | Yes (feasibility, fidelity) |
| Kamalumpundi (2022)<br>Inc: 1991 - 2019<br>N: 23<br>Search: Cancer + palliative therapy + internet                                  | Purpose: Determine the efficacy on emotional symptoms and describe intervention components of web- and mobile-based interventions among adults with advanced cancer<br>Conclusion: Web- and mobile-based interventions were not efficacious in alleviating emotional symptoms in samples of part or all adults with advanced cancer | Ind: Patients<br>Type: Mult / NS<br>Cont: Mult / NS                      | Care: Psychosocial support / distress management<br>HI: Mult / NS<br>Tech: eHealth, Mobile application                                          | MA: Yes<br>Comp: No<br>Type: Systematic<br>QA: Yes<br>MA Out: Web- and mobile- interventions showed no effect on anxiety or depression (overall or in RCT subset); for distress, there was no overall effect, but there was a small effect favoring interventions in RCTs | No                          |
| Kane (2021)<br>Inc: earliest available - 2019<br>N: 37<br>Search: Advanced cancer + interventions + web and technological platforms | Purpose: Describe features of web- and technological interventions for patients with advanced cancer and their efficacy<br>Conclusion: Interventions were complex and varied, but largely resulted in improvements in patients' quality of life and psychological well-being                                                        | Ind: Patients<br>Type: Mult / NS<br>Cont: Treatment / symptom management | Care: Mult / NS<br>HI: Mult / NS<br>Tech: eHealth, Mobile application                                                                           | MA: No<br>Comp: Yes: Any<br>Type: Systematic<br>QA: Yes                                                                                                                                                                                                                   | No                          |
| Kang (2018)<br>Inc: earliest available - 2015<br>N: 4<br>Search: Cancer + sexual intervention + Internet                            | Purpose: Describe online interventions for sexual health among cancer survivors and/or their partners<br>Conclusion: Online interventions appear effective in improving the psycho-sexual problems of cancer survivors and their partners                                                                                           | Ind: Patients, Family<br>Type: Mult / NS<br>Cont: Mult / NS              | Care: Other (interventions for sexual health)<br>HI: Healthcare professional<br>Tech: Synchronous telehealth, Email / secure messaging, eHealth | MA: No<br>Comp: No<br>Type: Systematic<br>QA: Yes                                                                                                                                                                                                                         | No                          |

|                                                                                                                       |                                                                                                                                                                                                                                                                                                                                                                                                                                   |                                                                      |                                                                                                                                                                                               |                                                             |                                                   |
|-----------------------------------------------------------------------------------------------------------------------|-----------------------------------------------------------------------------------------------------------------------------------------------------------------------------------------------------------------------------------------------------------------------------------------------------------------------------------------------------------------------------------------------------------------------------------|----------------------------------------------------------------------|-----------------------------------------------------------------------------------------------------------------------------------------------------------------------------------------------|-------------------------------------------------------------|---------------------------------------------------|
| <p>Karim (2020)<br/>Inc: 2009 - 2019<br/>N: 9<br/>Search: Sexual health + mobile technology</p>                       | <p>Purpose: Describe published evidence on mobile interventions for sexual health in adults with chronic diseases<br/>Conclusion: Studies showed a positive effect of interventions on sexual health outcomes</p>                                                                                                                                                                                                                 | <p>Ind: Patients, Family<br/>Type: Mult / NS<br/>Cont: Mult / NS</p> | <p>Care: Other (interventions for sexual health)<br/>HI: Mult / NS<br/>Tech: Synchronous telehealth, Email / secure messaging, eHealth</p>                                                    | <p>MA: No<br/>Comp: No<br/>Type: Systematic<br/>QA: Yes</p> | <p>Yes (acceptability, feasibility, fidelity)</p> |
| <p>Keikha (2022)<br/>Inc: earliest available - 2019<br/>N: 45<br/>Search: Breast cancer + exercise + telemedicine</p> | <p>Purpose: Describe technology-assisted interventions for improving physical activity in breast cancer patients<br/>Conclusion: Technology-assisted interventions can improve the health of breast cancer patients</p>                                                                                                                                                                                                           | <p>Ind: Patients<br/>Type: Breast<br/>Cont: Mult / NS</p>            | <p>Care: Health behavior change<br/>HI: Mult / NS<br/>Tech: Synchronous telehealth, Text messaging / SMS, Email / secure messaging, eHealth, Mobile application, Other (wearable devices)</p> | <p>MA: No<br/>Comp: No<br/>Type: Systematic<br/>QA: No</p>  | <p>No</p>                                         |
| <p>Khoo (2021)<br/>Inc: 2000 - 2020<br/>N: 32<br/>Search: Cancer + physical activity + mHealth</p>                    | <p>Purpose: Evaluate available literature on mobile health interventions to promote physical activity or reduce sedentary behavior in cancer survivors<br/>Conclusion: Strong evidence supports mHealth interventions increasing moderate-to-vigorous intensity physical activity in cancer survivors, but there is inconclusive evidence on mHealth intervention impact on total activity, step count, or sedentary behavior</p> | <p>Ind: Patients<br/>Type: Mult / NS<br/>Cont: Survivorship</p>      | <p>Care: Health behavior change<br/>HI: Mult / NS<br/>Tech: Synchronous telehealth, Text messaging / SMS, Email / secure messaging, eHealth, Mobile application</p>                           | <p>MA: No<br/>Comp: No<br/>Type: Systematic<br/>QA: Yes</p> | <p>No</p>                                         |

|                                                                                                            |                                                                                                                                                                                                                                                                                                                                              |                                                        |                                                                                                                                                                                                    |                                                         |                                       |
|------------------------------------------------------------------------------------------------------------|----------------------------------------------------------------------------------------------------------------------------------------------------------------------------------------------------------------------------------------------------------------------------------------------------------------------------------------------|--------------------------------------------------------|----------------------------------------------------------------------------------------------------------------------------------------------------------------------------------------------------|---------------------------------------------------------|---------------------------------------|
| Kim (2019)<br>Inc: earliest available - 2018<br>N: 7<br>Search: Cancer + cognitive rehabilitation + online | Purpose: Describe available computerized cognitive interventions for cancer survivors<br>Conclusion: Computerized cognitive interventions had positive impacts on objective, subjective, and psychological aspects of cognitive concerns for cancer survivors                                                                                | Ind: Patients<br>Type: Mult / NS<br>Cont: Survivorship | Care: Other (cognitive rehabilitation)<br>HI: Mult / NS<br>Tech: eHealth                                                                                                                           | MA: No<br>Comp: No<br>Type: Systematic<br>QA: No        | Yes (acceptability)                   |
| Kiss (2019)<br>Inc: 1973 - 2018<br>N: 16<br>Search: Cancer + nutrition / physical activity + telehealth    | Purpose: Describe and appraise the efficacy of technology-supported self-guided nutrition and physical activity interventions for people with cancer<br>Conclusion: Technology-supported self-guided interventions have short-term benefits on physical activity level, fatigue, and some benefit on diet and health-related quality of life | Ind: Patients<br>Type: Mult / NS<br>Cont: Mult / NS    | Care: Health behavior change<br>HI: Mult / NS<br>Tech: Synchronous telehealth, Text messaging / SMS, Email / secure messaging, eHealth, Mobile application, Other (social media, wearable devices) | MA: No<br>Comp: Yes: Any<br>Type: Systematic<br>QA: Yes | Yes (adoption, feasibility, fidelity) |
| Kitamura (2010)<br>Inc: 1966 - 2008<br>N: 19<br>Search: Cancer + telehealth                                | Purpose: Evaluate the feasibility of video consultation for assessment, monitoring, and management of cancer patients<br>Conclusion: Evidence suggests video consultation is feasible and effective for cancer care; however, studies tended to be small and methodologically weak                                                           | Ind: Patients<br>Type: Mult / NS<br>Cont: Mult / NS    | Care: Mult / NS<br>HI: Healthcare professional<br>Tech: Synchronous telehealth                                                                                                                     | MA: No<br>Comp: No<br>Type: Systematic<br>QA: No        | Yes (acceptability, fidelity, cost)   |
| Koç (2022)<br>Inc: 2015 - 2019<br>N: 16<br>Search: Breast cancer + telehealth                              | Purpose: Summarize evidence from studies of telehealth psychological interventions on the mental health of women with breast cancer<br>Conclusion: There is evidence of the positive effect of telehealth programs on a wide range of psychological constructs among women with breast cancer                                                | Ind: Patients<br>Type: Breast<br>Cont: Mult / NS       | Care: Psychosocial support / distress management<br>HI: Mult / NS<br>Tech: Synchronous telehealth, eHealth, Mobile application                                                                     | MA: No<br>Comp: Yes: Any<br>Type: Systematic<br>QA: No  | No                                    |

|                                                                                                                                                                                                   |                                                                                                                                                                                                                                                                                                      |                                                                                   |                                                                                                                                                            |                                                                                                                                                                                    |                                             |
|---------------------------------------------------------------------------------------------------------------------------------------------------------------------------------------------------|------------------------------------------------------------------------------------------------------------------------------------------------------------------------------------------------------------------------------------------------------------------------------------------------------|-----------------------------------------------------------------------------------|------------------------------------------------------------------------------------------------------------------------------------------------------------|------------------------------------------------------------------------------------------------------------------------------------------------------------------------------------|---------------------------------------------|
| <p>Kopp (2016)<br/>Inc: earliest available - 2015<br/>N: 6<br/>Search: Childhood cancer survivors + lifestyle intervention + chronic disease risk factors + electronic or mobile technologies</p> | <p>Purpose: Describe technology-based lifestyle interventions for childhood, adolescent, and young adult cancer survivors<br/>Conclusion: Few interventions have been developed and study to address prevention of chronic conditions in childhood, adolescent, and young adult cancer survivors</p> | <p>Ind: Patients<br/>Type: Mult / NS<br/>Cont: Survivorship</p>                   | <p>Care: Health behavior change<br/>HI: Mult / NS<br/>Tech: Synchronous telehealth, Text messaging / SMS, eHealth, other (Active gaming, social media)</p> | <p>MA: No<br/>Comp: No<br/>Type: Systematic<br/>QA: Yes</p>                                                                                                                        | <p>Yes<br/>(acceptability, feasibility)</p> |
| <p>Larson (2018)<br/>Inc: earliest available - 2016<br/>N: 9<br/>Search: Cancer + quality of life + telehealth</p>                                                                                | <p>Purpose: Evaluate the effects of telehealth-based interventions providing emotional and symptom support on improving quality of life among cancer patients<br/>Conclusion: Telehealth interventions are non-inferior to usual care in improving quality of life among cancer patients</p>         | <p>Ind: Patients<br/>Type: Mult / NS<br/>Cont: Treatment / symptom management</p> | <p>Care: Mult / NS<br/>HI: Mult / NS<br/>Tech: Synchronous telehealth, eHealth</p>                                                                         | <p>MA: Yes<br/>Comp: No<br/>Type: Systematic<br/>QA: No<br/>MA Out: telehealth interventions appear to produce a comparable beneficial effect on quality of life as usual care</p> | <p>No</p>                                   |
| <p>Larson (2020)<br/>Inc: earliest available - 2017<br/>N: 11<br/>Search: Cancer + quality of life + telehealth</p>                                                                               | <p>Purpose: Compare the effect of telehealth interventions to usual care on cancer survivors' quality of life<br/>Conclusion: Evidence suggests a large effect of telehealth interventions on cancer survivors' quality of life relative to usual care</p>                                           | <p>Ind: Patients<br/>Type: Mult / NS<br/>Cont: Survivorship</p>                   | <p>Care: Mult / NS<br/>HI: Mult / NS<br/>Tech: Synchronous telehealth, Email / secure messaging, eHealth</p>                                               | <p>MA: Yes<br/>Comp: Yes: Usual Care<br/>Type: Systematic<br/>QA: Yes<br/>MA Out: Interventions produced greater improvements in quality of life</p>                               | <p>No</p>                                   |
| <p>Li, J (2021)<br/>Inc: earliest available - 2021<br/>N: 28<br/>Search: Cancer + telehealth</p>                                                                                                  | <p>Purpose: Evaluate the efficacy of telehealth interventions on quality of life among cancer survivors<br/>Conclusion: Telehealth interventions are effective in improving cancer survivors' quality of life, particularly mobile applications and short-term interventions</p>                     | <p>Ind: Patients<br/>Type: Mult / NS<br/>Cont: Mult / NS</p>                      | <p>Care: Mult / NS<br/>HI: Mult / NS<br/>Tech: Synchronous telehealth, eHealth, Mobile application</p>                                                     | <p>MA: Yes<br/>Comp: Yes: Any<br/>Type: Systematic<br/>QA: Yes<br/>MA Out: Telehealth interventions show significant positive effects on survivors' quality of life.</p>           | <p>No</p>                                   |

|                                                                                                                                              |                                                                                                                                                                                                                                                                                                                                                       |                                                                                     |                                                                                                                                                      |                                                                                                                                                                                                                           |           |
|----------------------------------------------------------------------------------------------------------------------------------------------|-------------------------------------------------------------------------------------------------------------------------------------------------------------------------------------------------------------------------------------------------------------------------------------------------------------------------------------------------------|-------------------------------------------------------------------------------------|------------------------------------------------------------------------------------------------------------------------------------------------------|---------------------------------------------------------------------------------------------------------------------------------------------------------------------------------------------------------------------------|-----------|
| <p>Li, J (2022)<br/> Inc: earliest available - 2020<br/> N: 25<br/> Search: Cancer + pain / fatigue / sleep disorder + eHealth</p>           | <p>Purpose: Evaluate the efficacy of eHealth interventions on fatigue, pain, and sleep disorders in cancer survivors<br/> Conclusion: eHealth interventions have a positive impact on pain interference and sleep disorders, but not pain severity or fatigue in cancer survivors</p>                                                                 | <p>Ind: Patients<br/> Type: Mult / NS<br/> Cont: Survivorship</p>                   | <p>Care: Disease detection or management<br/> HI: Mult / NS<br/> Tech: Synchronous telehealth, Text messaging / SMS, eHealth, Mobile application</p> | <p>MA: Yes<br/> Comp: Yes: Any<br/> Type: Systematic<br/> QA: Yes<br/> MA Out: eHealth interventions had a positive impact on pain interference and sleep but not on pain severity or fatigue</p>                         | <p>No</p> |
| <p>Li, Y (2022)<br/> Inc: earliest available - 2021<br/> N: 7<br/> Search: Cancer + caregivers + telemedicine</p>                            | <p>Purpose: Evaluate the impact of eHealth interventions on informal cancer caregivers' caregiving burden, depression, and quality of life<br/> Conclusion: eHealth interventions are convenient for caregivers, and there was a positive impact on depression and quality of life but not caregiving burden</p>                                      | <p>Ind: Family<br/> Type: Mult / NS<br/> Cont: Mult / NS</p>                        | <p>Care: Psychosocial support / distress management<br/> HI: Mult / NS<br/> Tech: Synchronous telehealth, eHealth, Mobile application</p>            | <p>MA: Yes<br/> Comp: Yes: Any<br/> Type: Systematic<br/> QA: Yes<br/> MA Out: eHealth interventions showed significant favorable outcomes on caregivers' depression and quality of life, but not on caregiver burden</p> | <p>No</p> |
| <p>Lim (2019)<br/> Inc: earliest available - 2017<br/> N: 5<br/> Search: Cancer + adolescent / young adult + health education + Internet</p> | <p>Purpose: Evaluate the impact of technology-based interventions on empowerment-related outcomes for children, adolescents, and young adults with cancer<br/> Conclusion: There is inconclusive evidence on the impact of technology-based interventions on empowerment-related outcomes for children, adolescents, and young adults with cancer</p> | <p>Ind: Patients<br/> Type: Mult / NS<br/> Cont: Treatment / symptom management</p> | <p>Care: Mult / NS<br/> HI: Mult / NS<br/> Tech: eHealth, other (interactive humanoid robot)</p>                                                     | <p>MA: No<br/> Comp: Yes: Any<br/> Type: Systematic<br/> QA: Yes</p>                                                                                                                                                      | <p>No</p> |

|                                                                                                                                                        |                                                                                                                                                                                                                                                                                                        |                                                                                        |                                                                                                                                   |                                                                                                                                                                                                                                                                                                                                                               |                        |
|--------------------------------------------------------------------------------------------------------------------------------------------------------|--------------------------------------------------------------------------------------------------------------------------------------------------------------------------------------------------------------------------------------------------------------------------------------------------------|----------------------------------------------------------------------------------------|-----------------------------------------------------------------------------------------------------------------------------------|---------------------------------------------------------------------------------------------------------------------------------------------------------------------------------------------------------------------------------------------------------------------------------------------------------------------------------------------------------------|------------------------|
| Liptrott (2018)<br>Inc: earliest available - 2014<br>N: 48<br>Search: Cancer + acceptability + telehealth                                              | Purpose: Evaluate cancer patients' and survivors' perceived acceptability of, and satisfaction with, telephone-delivered interventions<br>Conclusion: Evidence was mixed regarding quality of support, impact, and need for telephone-delivered interventions, and further rigorous study is warranted | Ind: Patients<br>Type: Mult / NS<br>Cont: Treatment / symptom management, Survivorship | Care: Mult / NS<br>HI: Mult / NS<br>Tech: Synchronous telehealth                                                                  | MA: No<br>Comp: No<br>Type: Systematic<br>QA: Yes                                                                                                                                                                                                                                                                                                             | Yes<br>(acceptability) |
| Lopez-Rodriguez (2020)<br>Inc: 2008 - 2018<br>N: 8<br>Search: Pediatric oncology patients + pain, anxiety, or depression + technological interventions | Purpose: Describe the evidence regarding use of technology-based interventions for pain, anxiety, and depression in children and adolescents with cancer<br>Conclusion: Technology-based interventions can be used therapeutically for children and adolescents with cancer                            | Ind: Patients<br>Type: Mult / NS<br>Cont: Treatment / symptom management               | Care: Psychosocial support / distress management<br>HI: Mult / NS<br>Tech: other (Virtual reality, video game, interactive robot) | MA: No<br>Comp: No<br>Type: Systematic<br>QA: Yes                                                                                                                                                                                                                                                                                                             | No                     |
| Luo (2021)<br>Inc: earliest available - 2020<br>N: 24<br>Search: Breast cancer + self-management + randomized controlled trial + mHealth               | Purpose: Evaluate the effectiveness of mobile health-based self-management interventions in breast cancer patients<br>Conclusion: Mobile health-based interventions could potentially improve breast cancer patients' self-management behavior                                                         | Ind: Patients<br>Type: Breast<br>Cont: Mult / NS                                       | Care: Mult / NS<br>HI: Mult / NS<br>Tech: Text messaging / secure messaging, eHealth, Mobile application, Other (social media)    | MA: Yes<br>Comp: Yes: Usual Care<br>Type: Systematic<br>QA: Yes<br>MA Out: Mobile health-based self-management interventions improved breast cancer survivors' functional exercise compliance, self-efficacy, health related quality of life, lymphedema, and anxiety; there was no effect on symptom relief, role functioning, depression, or social support | No                     |

|                                                                                                           |                                                                                                                                                                                                                                                   |                                                                          |                                                                                                                                                   |                                                   |                                            |
|-----------------------------------------------------------------------------------------------------------|---------------------------------------------------------------------------------------------------------------------------------------------------------------------------------------------------------------------------------------------------|--------------------------------------------------------------------------|---------------------------------------------------------------------------------------------------------------------------------------------------|---------------------------------------------------|--------------------------------------------|
| Magalhães (2020)<br>Inc: earliest available - 2019<br>N: 26<br>Search: Cancer + chemotherapy + mHealth    | Purpose: Describe available mobile applications for cancer patients undergoing chemotherapy<br>Conclusion: Mobile applications appear effective in monitoring adherence and supporting self-management of complications during chemotherapy       | Ind: Patients<br>Type: Mult / NS<br>Cont: Treatment / symptom management | Care: Disease detection or management<br>HI: Mult / NS<br>Tech: Mobile application                                                                | MA: No<br>Comp: No<br>Type: Scoping<br>QA: No*    | No                                         |
| Magalhães (2021)<br>Inc: earliest available - 2019<br>N: 10<br>Search: Cancer + chemotherapy + telehealth | Purpose: Describe available evidence regarding the use of mobile apps used during chemotherapy<br>Conclusion: Mobile apps are likely useful and acceptable to monitor and support self-management of treatment-related complications              | Ind: Patients<br>Type: Mult / NS<br>Cont: Treatment / symptom monitoring | Care: Disease detection or management<br>HI: Mult / NS<br>Tech: Synchronous telehealth, Text messaging / SMS, eHealth, Mobile application         | MA: No<br>Comp: No<br>Type: Systematic<br>QA: Yes | Yes (acceptability, feasibility, fidelity) |
| Marthick (2021)<br>Inc: 2000 - 2020<br>N: 20<br>Search: Cancer + supportive care + digital health         | Purpose: Evaluate digital health interventions for supportive care in cancer<br>Conclusion: Digital health interventions can improve health-related quality of life, symptom burden, depression, and functional capacity among people with cancer | Ind: Patients<br>Type: Mult / NS<br>Cont: Treatment / symptom management | Care: Mult / NS<br>HI: Mult / NS<br>Tech: Synchronous telehealth, Email / secure messaging, eHealth, Mobile application, Other (wearable devices) | MA: No<br>Comp: No<br>Type: Systematic<br>QA: Yes | No                                         |
| Marzorati (2018)<br>Inc: earliest available - 2017<br>N: 24<br>Search: Cancer + caregivers + telehealth   | Purpose: Characterize telehealth tools for family members of people with cancer<br>Conclusion: Interventions utilized web-based platforms and telephone calls, and all showed positive, but small effects on targeted outcomes                    | Ind: Family<br>Type: Mult / NS<br>Cont: Mult / NS                        | Care: Mult / NS<br>HI: Mult / NS<br>Tech: Synchronous telehealth                                                                                  | MA: No<br>Comp: No<br>Type: Systematic<br>QA: No  | Yes (acceptability)                        |

|                                                                                                                                  |                                                                                                                                                                                                                                                                                                                                           |                                                                                        |                                                                                                                                                          |                                                   |                             |
|----------------------------------------------------------------------------------------------------------------------------------|-------------------------------------------------------------------------------------------------------------------------------------------------------------------------------------------------------------------------------------------------------------------------------------------------------------------------------------------|----------------------------------------------------------------------------------------|----------------------------------------------------------------------------------------------------------------------------------------------------------|---------------------------------------------------|-----------------------------|
| Mata (2014)<br>Inc: earliest available - 2014<br>N: 5<br>Search: Prostatectomy + telehealth                                      | Purpose: Evaluate clinical trials of telephone follow-up interventions for men following radical prostatectomy<br>Conclusion: Interventions focused on psychological support and addressing physical symptoms following treatment, and support the use of monitoring post-prostatectomy patients via the telephone                        | Ind: Patients<br>Type: Prostate<br>Cont: Treatment / symptom management                | Care: Mult / NS<br>HI: Healthcare professional<br>Tech: Synchronous telehealth                                                                           | MA: No<br>Comp: No<br>Type: Systematic<br>QA: Yes | No                          |
| Matis (2020)<br>Inc: earliest available - 2020<br>N: 29<br>Search: Cancer + mindfulness intervention + eHealth                   | Purpose: Characterize and evaluate (feasibility, efficacy) eHealth mindfulness-based interventions for improving psychological well-being among people with cancer<br>Conclusion: Effects were heterogeneous, but eHealth appears to be supported as an appropriate way to deliver mindfulness interventions to people with cancer        | Ind: Patients<br>Type: Mult / NS<br>Cont: Mult / NS                                    | Care: Psychosocial support / distress management<br>HI: Mult / NS<br>Tech: Synchronous telehealth, Email / secure messaging, eHealth, Mobile application | MA: No<br>Comp: No<br>Type: Systematic<br>QA: Yes | Yes (feasibility, fidelity) |
| McAlpine (2015)<br>Inc: earliest available - 2014<br>N: 14<br>Search: Cancer + Quality of life / survivorship + online community | Purpose: Evaluate the efficacy of online resources that connect cancer patients with their healthcare clinicians and with supportive or educational resources<br>Conclusion: Evidence was mixed, including studies with positive effects on quality of life as well as those showing poorer outcomes among intervention participants      | Ind: Patients<br>Type: Mult / NS<br>Cont: Mult / NS                                    | Care: Mult / NS<br>HI: Mult / NS<br>Tech: Email / secure messaging, eHealth                                                                              | MA: No<br>Comp: No<br>Type: Systematic<br>QA: No  | No                          |
| McCann (2019)<br>Inc: earliest available - 2017<br>N: 43<br>Search: Cancer + Adolescent / young adult + telehealth               | Purpose: Evaluate quality, feasibility, and efficacy of digital health interventions for adolescents and young adults living with and beyond cancer<br>Conclusion: Numerous digital health interventions have been developed to support adolescents and young adults with cancer; however, few have been deployed or implemented at scale | Ind: Patients<br>Type: Mult / NS<br>Cont: Treatment / symptom management, Survivorship | Care: Mult / NS<br>HI: Mult / NS<br>Tech: Synchronous telehealth, Text messaging / SMS, Email / secure messaging, eHealth, Mobile application            | MA: No<br>Comp: No<br>Type: Systematic<br>QA: Yes | No                          |



|                                                                                                                           |                                                                                                                                                                                                                                                                                                                                                                                                                                                                          |                                                                                                |                                                                                                               |                                                         |                                                   |
|---------------------------------------------------------------------------------------------------------------------------|--------------------------------------------------------------------------------------------------------------------------------------------------------------------------------------------------------------------------------------------------------------------------------------------------------------------------------------------------------------------------------------------------------------------------------------------------------------------------|------------------------------------------------------------------------------------------------|---------------------------------------------------------------------------------------------------------------|---------------------------------------------------------|---------------------------------------------------|
| Mehdizadeh (2019)<br>Inc: 2007 - 2018<br>N: 24<br>Search: Cancer + caregivers / children + telehealth                     | Purpose: Characterize smartphone apps used to help children and adolescents living with and beyond cancer and their families<br>Conclusion: Multiple smartphone apps have been developed to support children and adolescents following cancer, but few for supporting their families                                                                                                                                                                                     | Ind: Patients, Family<br>Type: Mult / NS<br>Cont: Treatment / symptom management, Survivorship | Care: Mult / NS<br>HI: Mult / NS<br>Tech: Mobile application                                                  | MA: No<br>Comp: No<br>Type: Scoping<br>QA: No*          | No                                                |
| Mikles (2021)<br>Inc: 2000 - 2020<br>N: 60<br>Search: Cancer survivorship + care planning + Health information technology | Purpose: Evaluate functions and impacts of electronic cancer survivorship care planning interventions on patient and provider outcomes<br>Conclusion: Features of electronic interventions that engaged users persistently over time were associated with better health and quality-of-life outcomes                                                                                                                                                                     | Ind: Patients, Family, Healthcare Personnel<br>Type: Mult / NS<br>Cont: Survivorship           | Care: Mult / NS<br>HI: Mult / NS<br>Tech: Email / secure messaging, eHealth, Other (Electronic health record) | MA: No<br>Comp: No<br>Type: Systematic<br>QA: Yes       | Yes (acceptability, appropriateness, feasibility) |
| Moradian (2018)<br>Inc: 2000 - 2016<br>N: 6<br>Search: Cancer + chemotherapy + self-management + Internet                 | Purpose: Evaluate the efficacy of Internet-based interventions on cancer chemotherapy-related physical symptoms and quality of life and identify processes for implementing these interventions into oncology practice<br>Conclusion: Evidence generally supports the use of Internet interventions for supporting patient engagement and self-management of chemotherapy-related symptoms, but further research is needed for their uptake in routine clinical practice | Ind: Patients<br>Type: Mult / NS<br>Cont: Treatment / symptom management                       | Care: Disease detection or management<br>HI: Mult / NS<br>Tech: Email / secure messaging, eHealth             | MA: No<br>Comp: Yes: Any<br>Type: Systematic<br>QA: Yes | Yes (fidelity)                                    |

|                                                                                             |                                                                                                                                                                                                                                                                                                                                                                                       |                                                                                        |                                                                                                                                  |                                                         |                                                  |
|---------------------------------------------------------------------------------------------|---------------------------------------------------------------------------------------------------------------------------------------------------------------------------------------------------------------------------------------------------------------------------------------------------------------------------------------------------------------------------------------|----------------------------------------------------------------------------------------|----------------------------------------------------------------------------------------------------------------------------------|---------------------------------------------------------|--------------------------------------------------|
| Moretto (2019)<br>Inc: 2013 - 2018<br>N: 19<br>Search: Outpatient chemotherapy + telehealth | Purpose: Evaluate research on telephone follow-up interventions by nurses for patients undergoing outpatient chemotherapy treatment<br>Conclusion: Nurse-led telephone interventions for patients undergoing outpatient chemotherapy are common, and primarily address symptom management, quality of life, self-efficacy, and psychosocial support                                   | Ind: Patients<br>Type: Mult / NS<br>Cont: Treatment / symptom management               | Care: Mult / NS<br>HI: Healthcare professional<br>Tech: Synchronous telehealth                                                   | MA: No<br>Comp: No<br>Type: Integrative<br>QA: Yes      | No                                               |
| Morris (2022)<br>Inc: 2009 - 2021<br>N: 54<br>Search: Cancer + rural health + telemedicine  | Purpose: Critically examine research on how digital technologies have supported rural oncology care<br>Conclusion: Rural cancer survivors value digital health approaches in cancer care, although ease of use and technological requirements are important to consider for this population                                                                                           | Ind: Patients, Family, Healthcare Personnel<br>Type: Mult / NS<br>Cont: Mult / NS      | Care: Mult / NS<br>HI: Mult / NS<br>Tech: Synchronous telehealth, eHealth, Mobile application                                    | MA: No<br>Comp: No<br>Type: Systematic<br>QA: Yes       | Yes (acceptability, feasibility, fidelity, cost) |
| Morrison (2020)<br>Inc: 2010 - 2020<br>N: 29<br>Search: Cancer + exercise + telehealth      | Purpose: Evaluate the feasibility and impact of telehealth exercise interventions for individuals diagnosed with cancer<br>Conclusion: Across studies, patients showed good adherence, symptom improvement, and reported a positive experience using telehealth exercise interventions, with no adverse events reported                                                               | Ind: Patients<br>Type: Mult / NS<br>Cont: Treatment / symptom management, Survivorship | Care: Health behavior change<br>HI: Mult / NS<br>Tech: Synchronous telehealth, Text messaging / SMS, eHealth, Mobile application | MA: No<br>Comp: No<br>Type: Rapid<br>QA: Yes            | Yes (feasibility, fidelity)                      |
| Okuyama (2015)<br>Inc: 1966 - 2013<br>N: 20<br>Search: Cancer + telephone counseling        | Purpose: Describe the efficacy of psychosocial telephone interventions for patients with cancer<br>Conclusion: Methodological concerns and lack of consistency in adhering to CONSORT guidelines was found; this body of research would benefit from rigorous, theory-based RCTs to provide more definitive evidence on psychosocial telephone interventions for patients with cancer | Ind: Patients<br>Type: Mult / NS<br>Cont: Mult / NS                                    | Care: Psychosocial support / distress management<br>HI: Mult / NS<br>Tech: Synchronous telehealth                                | MA: No<br>Comp: Yes: Any<br>Type: Systematic<br>QA: Yes | No                                               |

|                                                                                                                      |                                                                                                                                                                                                                                                                                                                                                                                                             |                                                                                                          |                                                                                                              |                                                                        |                                               |
|----------------------------------------------------------------------------------------------------------------------|-------------------------------------------------------------------------------------------------------------------------------------------------------------------------------------------------------------------------------------------------------------------------------------------------------------------------------------------------------------------------------------------------------------|----------------------------------------------------------------------------------------------------------|--------------------------------------------------------------------------------------------------------------|------------------------------------------------------------------------|-----------------------------------------------|
| Osborn (2020)<br>Inc: earliest available - 2018<br>N: 17<br>Search: Cancer + clinical outcomes + mobile applications | Purpose: Evaluate the effect of mHealth applications relative to usual care on common clinical outcomes among cancer patients<br>Conclusion: Evidence supports mHealth applications for cancer symptom control, but there was little data on other common clinical outcomes                                                                                                                                 | Ind: Patients<br>Type: Mult / NS<br>Cont: Treatment / symptom management                                 | Care: Mult / NS<br>HI: Mult / NS<br>Tech: eHealth, Mobile application                                        | MA: No<br>Comp: Yes: Usual care<br>Type: Critical appraisal<br>QA: No* | Yes<br>(acceptability)                        |
| Öter (2022)<br>Inc: 2020 - 2021<br>N: 5<br>Search: Breast cancer + COVID-19 + telehealth                             | Purpose: Evaluate the effectiveness of telemedicine to continue breast cancer follow-up care during the COVID-19 pandemic<br>Conclusion: Telemedicine was an effective method to continue outpatient care for breast cancer patients during the pandemic, although demand and benefit were affected by sociodemographic factors                                                                             | Ind: Patients<br>Type: Breast<br>Cont: Treatment / symptom management                                    | Care: Disease detection or management<br>HI: Mult / NS<br>Tech: Synchronous telehealth, Text messaging / SMS | MA: No<br>Comp: No<br>Type: Scoping<br>QA: No*                         | No                                            |
| Owensworth (2021)<br>Inc: 1980 - 2020<br>N: 17<br>Search: Brain cancer + supportive care + telehealth                | Purpose: Evaluate the feasibility, acceptability, and efficacy of telehealth supportive care interventions for adults with primary brain tumour and their family caregivers<br>Conclusion: Delivering supportive care to brain cancer patients and their caregivers is feasible and acceptable, with generally better adherence and gains from synchronous versus asynchronous or self-guided interventions | Ind: Patients, Family<br>Type: Primary Brain Tumor<br>Cont: Treatment / symptom management, Survivorship | Care: Mult / NS<br>HI: Mult / NS<br>Tech: Synchronous telehealth, Email / secure messaging, eHealth          | MA: No<br>Comp: No<br>Type: Systematic<br>QA: Yes                      | Yes<br>(acceptability, feasibility, fidelity) |

|                                                                                                                                                |                                                                                                                                                                                                                                                                                                                                                          |                                                                                        |                                                                                                            |                                                                                                                                                                                                                                   |                               |
|------------------------------------------------------------------------------------------------------------------------------------------------|----------------------------------------------------------------------------------------------------------------------------------------------------------------------------------------------------------------------------------------------------------------------------------------------------------------------------------------------------------|----------------------------------------------------------------------------------------|------------------------------------------------------------------------------------------------------------|-----------------------------------------------------------------------------------------------------------------------------------------------------------------------------------------------------------------------------------|-------------------------------|
| Pang (2020)<br>Inc: earliest available - 2020<br>N: 8<br>Search: Lung cancer + telehealth                                                      | Purpose: Evaluate the efficacy of telehealth relative to usual care on quality of life in lung cancer patients<br>Conclusion: telehealth interventions produced a superior effect on quality of life and psychological outcomes relative to usual care in lung cancer patients                                                                           | Ind: Patients<br>Type: Lung<br>Cont: Treatment / symptom management                    | Care: Psychosocial support / distress management<br>HI: Mult / NS<br>Tech: Synchronous telehealth, eHealth | MA: Yes<br>Comp: Yes: Usual Care<br>Type: Systematic<br>QA: Yes<br>MA Out: telehealth interventions produce greater improvements than control for quality of life, anxiety, and depression, but no differences in fatigue or pain | No                            |
| Qan'ir (2019)<br>Inc: 2000 - 2018<br>N: 10<br>Search: Prostate cancer + anxiety / depression / quality of life + telehealth                    | Purpose: Describe the characteristics of technology-based interventions and evaluate their effects on anxiety, depression, and quality of life in prostate cancer patients<br>Conclusion: Evidence was insufficient to support effectiveness of technology-based interventions in prostate cancer on anxiety, depression, and quality of life            | Ind: Patients<br>Type: Prostate<br>Cont: Treatment / symptom management, Survivorship  | Care: Mult / NS<br>HI: Mult / NS<br>Tech: Synchronous telehealth, eHealth, Mobile application              | MA: No<br>Comp: No<br>Type: Systematic<br>QA: Yes                                                                                                                                                                                 | No                            |
| Ramsey (2020)<br>Inc: earliest available - 2019<br>N: 21<br>Search: Cancer + adolescent / young adult + patient reported outcomes + telehealth | Purpose: Describe and evaluate the efficacy of e/mHealth interventions for pediatric and young adult cancer patients and survivors<br>Conclusion: Evidence was mixed, but suggestive of positive effects for digital health interventions on emotional distress, health behavior change, health outcomes, and neurocognitive function in this population | Ind: Patients<br>Type: Mult / NS<br>Cont: Treatment / symptom management, Survivorship | Care: Mult / NS<br>HI: Mult / NS<br>Tech: eHealth, Mobile application                                      | MA: No<br>Comp: No<br>Type: Systematic<br>QA: Yes                                                                                                                                                                                 | Yes (acceptability, fidelity) |

|                                                                                                                                                   |                                                                                                                                                                                                                                                                                                                                                                                                                                      |                                                                       |                                                                                                                              |                                                                                                       |    |
|---------------------------------------------------------------------------------------------------------------------------------------------------|--------------------------------------------------------------------------------------------------------------------------------------------------------------------------------------------------------------------------------------------------------------------------------------------------------------------------------------------------------------------------------------------------------------------------------------|-----------------------------------------------------------------------|------------------------------------------------------------------------------------------------------------------------------|-------------------------------------------------------------------------------------------------------|----|
| Rat (2018)<br>Inc: 2007 - 2017<br>N: 25<br>Search: Skin cancer + telehealth                                                                       | Purpose: Evaluate the evidence on the diagnostic performance, medical care impact, and technical feasibility of smartphone app store-and-forward teledermatology<br>Conclusion: While store-and-forward teledermatology could improve access to care, there was insufficient evidence of the safety and efficacy of automated smartphone apps designed for this purpose                                                              | Ind: Patients<br>Type: Skin / Melanoma<br>Cont: Screening / diagnosis | Care: Disease detection or management<br>HI: Mult / NS<br>Tech: Mobile application, Other (store-and-forward image transfer) | MA: No<br>Comp: No<br>Type: Systematic<br>QA: Yes                                                     | No |
| Ream (2020)<br>Inc: earliest available - 2019<br>N: 32<br>Search: Cancer + physical and psychological symptoms associated with cancer + telephone | Purpose: Evaluate the effectiveness of telephone-delivered interventions for reducing symptoms associated with cancer and its treatment, which symptoms are most responsive, and whether certain configurations or duration/frequency of calls mediate effects<br>Conclusion: While telephone interventions appear to relieve some symptoms, studies were small and evidence was heterogeneous, so confidence in the evidence is low | Ind: Patients<br>Type: Mult / NS<br>Cont: Mult / NS                   | Care: Mult / NS<br>HI: Healthcare professional<br>Tech: Synchronous telehealth                                               | MA: No<br>Comp: Yes: Usual Care or Other (telephone attention control)<br>Type: Systematic<br>QA: Yes | No |

|                                                                                                                                                                                       |                                                                                                                                                                                                                                                                                                                                                                                                                                                                                                                                     |                                                                            |                                                                                                                                                                                                              |                                                                                                                                                                                                                                                                                                                                                        |                                              |
|---------------------------------------------------------------------------------------------------------------------------------------------------------------------------------------|-------------------------------------------------------------------------------------------------------------------------------------------------------------------------------------------------------------------------------------------------------------------------------------------------------------------------------------------------------------------------------------------------------------------------------------------------------------------------------------------------------------------------------------|----------------------------------------------------------------------------|--------------------------------------------------------------------------------------------------------------------------------------------------------------------------------------------------------------|--------------------------------------------------------------------------------------------------------------------------------------------------------------------------------------------------------------------------------------------------------------------------------------------------------------------------------------------------------|----------------------------------------------|
| <p>Roberts (2017)<br/>Inc: earliest available - 2017<br/>N: 15<br/>Search: Cancer survivor + physical activity / diet / sedentary behavior + digital behavior change intervention</p> | <p>Purpose: Assess the efficacy of health behavior interventions using digital technologies on physical activity, sedentary behavior, and diet in cancer survivors<br/>Conclusion: Digital behavior change interventions appear to improve physical activity and body mass index in cancer survivors, while evidence is mixed for diet</p>                                                                                                                                                                                          | <p>Ind: Patients<br/>Type: Mult / NS<br/>Cont: Mult / NS</p>               | <p>Care: Health behavior change<br/>HI: Mult / NS<br/>Tech: Synchronous telehealth, Text messaging / SMS, Email / secure messaging, eHealth, Mobile application, Other (Active gaming, wearable devices)</p> | <p>MA: Yes<br/>Comp: No<br/>Type: Systematic<br/>QA: Yes<br/>MA Out: Digital behavior change interventions increased minutes of physical activity, and reduced body mass index/weight and fatigue. There was no impact on cancer-specific quality of life. Dietary outcomes could not be meta-analyzed due to variation in measurement approaches.</p> | <p>Yes (adoption, feasibility, fidelity)</p> |
| <p>Rossmann (2021)<br/>Inc: 1992 - 2020<br/>N: 27<br/>Search: Cervical cancer + low- and middle-income countries + digital health</p>                                                 | <p>Purpose: Describe the efficacy, range, and implementation challenges of digital health strategies for cervical cancer control in low- and middle-income countries<br/>Conclusion: There is insufficient evidence to determine the effectiveness of digital health strategies for cervical cancer control throughout low- and middle-income countries; most available studies used digital health strategies to facilitate screening and treatment of precancerous lesions, and key implementation challenges were identified</p> | <p>Ind: Patients<br/>Type: Gynecologic<br/>Cont: Screening / diagnosis</p> | <p>Care: Mult / NS<br/>HI: Mult / NS<br/>Tech: Synchronous telehealth, Text messaging / SMS, eHealth, Mobile application, Other (Store-and-forward image transfer)</p>                                       | <p>MA: No<br/>Comp: No<br/>Type: Systematic<br/>QA: Yes</p>                                                                                                                                                                                                                                                                                            | <p>No</p>                                    |

|                                                                                                                |                                                                                                                                                                                                                                                                                                                                                                |                                                                                                       |                                                                                                                                                                                  |                                                                                                                                                                                                                                                           |                        |
|----------------------------------------------------------------------------------------------------------------|----------------------------------------------------------------------------------------------------------------------------------------------------------------------------------------------------------------------------------------------------------------------------------------------------------------------------------------------------------------|-------------------------------------------------------------------------------------------------------|----------------------------------------------------------------------------------------------------------------------------------------------------------------------------------|-----------------------------------------------------------------------------------------------------------------------------------------------------------------------------------------------------------------------------------------------------------|------------------------|
| Ruco (2021)<br>Inc: 2000 - 2020<br>N: 39<br>Search: Cancer + screening + social media or mHealth interventions | Purpose: Evaluate the effectiveness of social media and mHealth interventions to increase cancer screening participation and intentions for detectable cancers<br>Conclusion: mHealth interventions have a significant effect on cancer screening participation; there was insufficient available evidence to determine efficacy of social media interventions | Ind: Patients<br>Type: Breast, Colorectal, Gynecologic, Lung, Prostate<br>Cont: Screening / diagnosis | Care: Health behavior change<br>HI: Mult / NS<br>Tech: Synchronous telehealth, Text messaging / SMS, Email / secure messaging, eHealth, Mobile application, Other (Social media) | MA: Yes (article subset)<br>Comp: No* (meta-analysis only of included RCTs with any control)<br>Type: Systematic<br>QA: Yes<br>MA Out: telehealth interventions produce more breast, cervical, and colorectal screening participation relative to control | No                     |
| Saeidzadeh (2021)<br>Inc: 1991 - 2019<br>N: 19<br>Search: Cancer + symptom management + telehealth             | Purpose: Evaluate efficacy of mobile- and web-based interventions addressing physical symptoms in people with advanced cancer<br>Conclusion: Mobile- and web-delivered interventions were effective in reducing overall physical symptom burden in people with advanced cancer                                                                                 | Ind: Patients<br>Type: Mult / NS<br>Cont: Treatment / symptom management                              | Care: Mult / NS<br>HI: Mult / NS<br>Tech: eHealth, Mobile application                                                                                                            | MA: Yes<br>Comp: No<br>Type: Systematic<br>QA: Yes<br>MA Out: telehealth interventions produce favorable improvement in physical symptoms, but no different outcome for pain or fatigue, relative to standard clinical implementation of care             | No                     |
| Salmani (2020)<br>Inc: 2008 - 2019<br>N: 23<br>Search: Cancer + screening + mobile health                      | Purpose: Examine the effectiveness of mobile health applications on cancer screening<br>Conclusion: Mobile health applications have a positive impact on health-related behaviors and outcomes                                                                                                                                                                 | Ind: Patients<br>Type: Mult / NS<br>Cont: Screening / diagnosis                                       | Care: Mult / NS<br>HI: Mult / NS<br>Tech: Mobile application, Other (store-and-forward image transfer)                                                                           | MA: No<br>Comp: No<br>Type: Systematic<br>QA: No                                                                                                                                                                                                          | Yes<br>(acceptability) |

|                                                                                                                                                                                                              |                                                                                                                                                                                                                                                                                                                                                                                                     |                                                                      |                                                                                                                                                                                         |                                                                                                                                                                                                                                                                          |                          |
|--------------------------------------------------------------------------------------------------------------------------------------------------------------------------------------------------------------|-----------------------------------------------------------------------------------------------------------------------------------------------------------------------------------------------------------------------------------------------------------------------------------------------------------------------------------------------------------------------------------------------------|----------------------------------------------------------------------|-----------------------------------------------------------------------------------------------------------------------------------------------------------------------------------------|--------------------------------------------------------------------------------------------------------------------------------------------------------------------------------------------------------------------------------------------------------------------------|--------------------------|
| Sanchez (2013)<br>Inc: 2001 - 2010<br>N: 113<br>Search: Cancer prevention or control + intervention trial + eHealth interventions * (selected subset from an earlier systematic review, criteria not listed) | Purpose: Describe the extent to which pragmatic trial design features have been used and issues of translation, generalizability, and feasibility have been reported in studies of eHealth interventions in cancer prevention and control<br>Conclusion: Few studies considered or reported key external validity issues, and few studies used innovative designs to address key translation issues | Ind: Patients<br>Type: Mult / NS<br>Cont: Mult / NS                  | Care: Mult / NS<br>HI: Mult / NS<br>Tech: Synchronous telehealth, Text messaging / SMS, Email / secure messaging, eHealth, Mobile application, Other (Interactive voice response calls) | MA: No<br>Comp: No<br>Type: Systematic<br>QA: No                                                                                                                                                                                                                         | Yes (feasibility)        |
| Seiler (2017)<br>Inc: earliest available - 2016<br>N: 15<br>Search: Cancer + cancer-related fatigue + e/mHealth                                                                                              | Purpose: Examine the effectiveness of eHealth and mHealth interventions for the management of cancer-related fatigue<br>Conclusion: eHealth interventions appear effective in helping cancer survivors to manage cancer-related fatigue, although randomized controlled trials with longer follow-up periods are warranted                                                                          | Ind: Patients<br>Type: Mult / NS<br>Cont: Survivorship               | Care: Mult / NS<br>HI: Mult / NS<br>Tech: eHealth                                                                                                                                       | MA: Yes (article subset)<br>Comp: No* (meta-analysis only of included RCTs with any control)<br>Type: Systematic<br>QA: Yes<br>MA Out: telehealth interventions produced superior effects on fatigue, health-related quality of life, and depression relative to control | Yes (adoption, fidelity) |
| Sezgin (2022)<br>Inc: earliest available - 2021<br>N: 6<br>Search: Lymphoma + randomized controlled trials + web-based interventions                                                                         | Purpose: Evaluate the effect of web-based interventions on self-management and symptom management in patients with lymphoma<br>Conclusion: Although quality of evidence was limited, evidence suggests technology-based interventions may improve outcomes in patients with lymphoma                                                                                                                | Ind: Patients<br>Type: Blood<br>Cont: Treatment / symptom management | Care: Mult / NS<br>HI: Mult / NS<br>Tech: eHealth                                                                                                                                       | MA: No<br>Comp: Yes: Any<br>Type: Systematic<br>QA: Yes                                                                                                                                                                                                                  | No                       |



|                                                                                                          |                                                                                                                                                                                                                                                                                 |                                                                          |                                                                                                                                                  |                                                               |                                                         |
|----------------------------------------------------------------------------------------------------------|---------------------------------------------------------------------------------------------------------------------------------------------------------------------------------------------------------------------------------------------------------------------------------|--------------------------------------------------------------------------|--------------------------------------------------------------------------------------------------------------------------------------------------|---------------------------------------------------------------|---------------------------------------------------------|
| Singh (2021)<br>Inc: 2015 - 2020<br>N: 39<br>Search: Cancer + telehealth                                 | Purpose: Summarize evidence from studies comparing virtual versus in-person cancer care<br>Conclusion: Virtual psychological and genetic counseling are equivalent or non-inferior to similar in-person care, but there is limited data on clinical outcomes or supportive care | Ind: Patients<br>Type: Mult / NS<br>Cont: Treatment / symptom management | Care: Mult / NS<br>HI: Mult / NS<br>Tech: Synchronous telehealth                                                                                 | MA: No<br>Comp: Yes: In-person<br>Type: Systematic<br>QA: Yes | Yes<br>(acceptability, appropriateness, fidelity, cost) |
| Soloe (2021)<br>Inc: 2010 - 2020<br>N: 23<br>Search: Cancer + healthcare provider training + mHealth     | Purpose: Describe studies of cancer-based mHealth and eHealth education and training interventions for improving health care professionals' delivery of cancer care<br>Conclusion: Evidence supports that mHealth and eHealth interventions can improve cancer care delivery    | Ind: Healthcare personnel<br>Type: Mult / NS<br>Cont: Mult / NS          | Care: Other (Trainings to improve cancer care delivery)<br>HI: Mult / NS<br>Tech: Synchronous telehealth, Text messaging / SMS, eHealth          | MA: No<br>Comp: No<br>Type: Systematic<br>QA: Yes             | No                                                      |
| Son (2019)<br>Inc: 2008 - 2018<br>N: 28<br>Search: Cancer + survivorship + health information technology | Purpose: Describe the use of health information technology programs in cancer survivorship care<br>Conclusion: Studies generally demonstrated positive findings, but results were overall inconclusive due to methodological limitations of the literature                      | Ind: Patients<br>Type: Mult / NS<br>Cont: Survivorship                   | Care: Mult / NS<br>HI: Mult / NS<br>Tech: Text messaging / SMS, eHealth, Mobile application, Other (Electronic Health Records / Patient portals) | MA: No<br>Comp: No<br>Type: Comprehensive<br>QA: Yes          | No                                                      |

|                                                                                                                                                            |                                                                                                                                                                                                                                                                                                                                                               |                                                                            |                                                                                                              |                                                                                                                                                                                                                                                                                                 |                                         |
|------------------------------------------------------------------------------------------------------------------------------------------------------------|---------------------------------------------------------------------------------------------------------------------------------------------------------------------------------------------------------------------------------------------------------------------------------------------------------------------------------------------------------------|----------------------------------------------------------------------------|--------------------------------------------------------------------------------------------------------------|-------------------------------------------------------------------------------------------------------------------------------------------------------------------------------------------------------------------------------------------------------------------------------------------------|-----------------------------------------|
| Soon-Rim Suh (2017)<br>Inc: 1996 - 2016<br>N: 16<br>Search: Cancer + nurse + intervention + telephone                                                      | Purpose: Evaluate the effects of nurse-led telephone-delivered supportive interventions for patients with cancer<br>Conclusion: Nurse-led telephone interventions showed consistent positive impact on cancer symptoms and emotional distress among patients with cancer, although there was not an effect on adjustment or patient satisfaction              | Ind: Patients<br>Type: Mult / NS<br>Cont: Treatment / symptom management   | Care: Mult / NS<br>HI: Healthcare professional<br>Tech: Synchronous telehealth                               | MA: Yes<br>Comp: Yes: Any<br>Type: Systematic<br>QA: Yes<br>MA Out: Nurse-led telephone interventions showed positive impacts on cancer patients' cancer symptoms, emotional distress, self-care, and health-related quality of life; there was no effect on adjustment or patient satisfaction | No                                      |
| Sotirova (2021)<br>Inc: earliest available - 2020<br>N: 11<br>Search: Cancer + surgery, self-management, exercise, and response to intervention + Internet | Purpose: Describe adherence, acceptability, and satisfaction with exercise-based online self-management programs for post-surgical cancer rehabilitation<br>Conclusion: Studies were heterogeneous; however, evidence suggests Internet-based approaches may be acceptable for delivering exercise-based interventions in post-surgical cancer rehabilitation | Ind: Patients<br>Type: Mult / NS<br>Cont: Other (post-surgery)             | Care: Health behavior change<br>HI: Mult / NS<br>Tech: Email / secure messaging, eHealth, Mobile application | MA: No<br>Comp: No<br>Type: Systematic<br>QA: Yes                                                                                                                                                                                                                                               | Yes (acceptability, adoption, fidelity) |
| Suleman (2022)<br>Inc: 2000 - 2021<br>N: 15<br>Search: Hematologic cancer + telehealth                                                                     | Purpose: Describe the use and impact of virtual care among patients with hematologic malignancies<br>Conclusion: Virtual care for patients with hematologic malignancies appears feasible and shows high patient satisfaction                                                                                                                                 | Ind: Patients<br>Type: Hematologic<br>Cont: Treatment / symptom management | Care: Mult / NS<br>HI: Mult / NS<br>Tech: Synchronous telehealth, Mobile application                         | MA: No<br>Comp: No<br>Type: Scoping<br>QA: No*                                                                                                                                                                                                                                                  | Yes (acceptability)                     |

|                                                                                                                                      |                                                                                                                                                                                                                                                                                                                                                      |                                                                                     |                                                                                                                     |                                                   |                        |
|--------------------------------------------------------------------------------------------------------------------------------------|------------------------------------------------------------------------------------------------------------------------------------------------------------------------------------------------------------------------------------------------------------------------------------------------------------------------------------------------------|-------------------------------------------------------------------------------------|---------------------------------------------------------------------------------------------------------------------|---------------------------------------------------|------------------------|
| Tarver (2019)<br>Inc: earliest available - 2016<br>N: 71<br>Search: Cancer + underserved populations + health information technology | Purpose: Describe current evidence on the use of cancer-specific patient-centered technologies among underserved populations<br>Conclusion: Technologies seem to be effective, particularly when tailored, on improving cancer patient- and care-related outcomes among underserved populations                                                      | Ind: Patients<br>Type: Mult / NS<br>Cont: Mult / NS                                 | Care: Mult / NS<br>HI: Mult / NS<br>Tech: Synchronous telehealth, Text messaging / SMS, eHealth, Mobile application | MA: No<br>Comp: No<br>Type: Systematic<br>QA: No  | Yes<br>(acceptability) |
| Taylor (2020)<br>Inc: 2007 - 2019<br>N: 23<br>Search: Hematologic cancer + eHealth                                                   | Purpose: Describe eHealth interventions for patients with hematological cancer across the illness trajectory<br>Conclusion: Diverse applications of eHealth interventions have been tested among patients with hematological cancer, including those for providing information, self-help techniques, facilitating communication, and PRO monitoring | Ind: Patients<br>Type: Hematologic<br>Cont: Mult / NS                               | Care: Mult / NS<br>HI: Mult / NS<br>Tech: Synchronous telehealth, eHealth, Mobile application                       | MA: No<br>Comp: No<br>Type: Systematic<br>QA: Yes | No                     |
| Thompson (2013)<br>Inc: 2000 - 2012<br>N: 36<br>Search: Cancer + behavioral, psychological, and social aspects of cancer + new media | Purpose: Assess the inclusion of underserved racial and ethnic minority groups in research on new media interventions in cancer<br>Conclusion: The potential of new media cancer interventions has largely not been realized among underserved racial and ethnic minority groups                                                                     | Ind: Patients, Family<br>Type: Mult / NS<br>Cont: Mult / NS                         | Care: Mult / NS<br>HI: Mult / NS<br>Tech: Email / secure messaging, eHealth, Other (interactive voice response)     | MA: No<br>Comp: No<br>Type: Systematic<br>QA: No  | No                     |
| Triberti (2019)<br>Inc: 2005 - 2018<br>N: 24<br>Search: Breast cancer + quality of life + telehealth                                 | Purpose: Evaluate use and efficacy of eHealth resources to improve quality of life of people with breast cancer<br>Conclusion: Results are generally favorable for eHealth resources to improve quality of life of people with breast cancer, particularly those that target specific skills (e.g., coping) and multicomponent interventions         | Ind: Patients<br>Type: Breast<br>Cont: Treatment / symptom management, Survivorship | Care: Mult / NS<br>HI: Mult / NS<br>Tech: Synchronous telehealth, eHealth, Mobile application                       | MA: No<br>Comp: No<br>Type: Systematic<br>QA: No  | No                     |

|                                                                                                                                                  |                                                                                                                                                                                                                                                                                                                                                                      |                                                                                        |                                                                                                                                           |                                                                                                                                                                                                                                                                 |                               |
|--------------------------------------------------------------------------------------------------------------------------------------------------|----------------------------------------------------------------------------------------------------------------------------------------------------------------------------------------------------------------------------------------------------------------------------------------------------------------------------------------------------------------------|----------------------------------------------------------------------------------------|-------------------------------------------------------------------------------------------------------------------------------------------|-----------------------------------------------------------------------------------------------------------------------------------------------------------------------------------------------------------------------------------------------------------------|-------------------------------|
| Uy (2017)<br>Inc: 2000 - 2017<br>N: 9<br>Search: Cancer + screening terms for breast, colorectal, gynecologic, and lung cancers + text messaging | Purpose: Assess the effect of text messaging interventions on screening for breast, cervical, colorectal, and lung cancers<br>Conclusion: Text messaging interventions appear to moderately increase breast and cervical cancer screening rates and have a small effect on colorectal screening rates; no studies were evident for such interventions in lung cancer | Ind: Patients<br>Type: Breast, Colorectal, Gynecologic<br>Cont: Screening / diagnosis  | Care: Health behavior change<br>HI: Mult / NS<br>Tech: Text messaging / SMS                                                               | MA: No<br>Comp: No<br>Type: Systematic<br>QA: Yes                                                                                                                                                                                                               | No                            |
| Ventura (2013)<br>Inc: 2000 - 2012<br>N: 28<br>Search: Cancer + patient education / support + Internet                                           | Purpose: Describe available supportive eHealth interventions for patients diagnosed with cancer<br>Conclusion: Supportive eHealth interventions have led to positive effects, although there is inconsistency across study outcomes due to heterogeneity of studies                                                                                                  | Ind: Patients<br>Type: Mult / NS<br>Cont: Mult / NS                                    | Care: Mult / NS<br>HI: Mult / NS<br>Tech: eHealth                                                                                         | MA: No<br>Comp: No<br>Type: Integrative<br>QA: Yes                                                                                                                                                                                                              | No                            |
| Viola (2020)<br>Inc: 2018 - 2019<br>N: 17<br>Search: Cancer + adolescent / young adult + digital health                                          | Purpose: Describe and evaluate the quality of recent digital health interventions for adolescent young adult survivors<br>Conclusion: Most studies focused on developing interventions and testing their feasibility and acceptability, with a critical gap in studies demonstrating the efficacy of these interventions                                             | Ind: Patients<br>Type: Mult / NS<br>Cont: Treatment / symptom management, Survivorship | Care: Mult / NS<br>HI: Mult / NS<br>Tech: Synchronous telehealth, Text messaging / SMS, eHealth, Mobile application, Other (social media) | MA: No<br>Comp: No<br>Type: Systematic<br>QA: Yes                                                                                                                                                                                                               | No                            |
| Wan (2022)<br>Inc: earliest available - 2021<br>N: 19<br>Search: Colorectal cancer + psychosocial interventions + web-based                      | Purpose: Evaluate the effectiveness of web-based psychosocial interventions on a range of outcomes for colorectal cancer patients<br>Conclusion: Web-based psychosocial interventions are promising ways to address colorectal cancer patients' anxiety, depression, and distress, although evidence is inconsistent for self-efficacy and quality of life           | Ind: Patients<br>Type: Colorectal<br>Cont: Mult / NS                                   | Care: Psychosocial support / distress management<br>HI: Mult / NS<br>Tech: Email / secure messaging, eHealth, Mobile application          | MA: Yes<br>Comp: No* (meta-analysis only of included RCTs with any control)<br>Type: Systematic<br>QA: Yes<br>MA Out: Web-based psychosocial interventions showed positive impacts on patients' self-efficacy, anxiety, and depression, but not quality of life | Yes (acceptability, fidelity) |

|                                                                                                                                                   |                                                                                                                                                                                                                                                                                                                                                     |                                                                                        |                                                                                                                       |                                                                                                                                                                                                                                 |                                            |
|---------------------------------------------------------------------------------------------------------------------------------------------------|-----------------------------------------------------------------------------------------------------------------------------------------------------------------------------------------------------------------------------------------------------------------------------------------------------------------------------------------------------|----------------------------------------------------------------------------------------|-----------------------------------------------------------------------------------------------------------------------|---------------------------------------------------------------------------------------------------------------------------------------------------------------------------------------------------------------------------------|--------------------------------------------|
| Wang (2020)<br>Inc: earliest available - 2019<br>N: 7<br>Search: Cancer + psychoeducation + randomized controlled trial + telehealth              | Purpose: Evaluate the effect of Internet-based psychoeducational interventions relative to usual care among cancer patients<br>Conclusion: Internet-based psychoeducational interventions reduce fatigue and depression relative to usual care among cancer patients                                                                                | Ind: Patients<br>Type: Mult / NS<br>Cont: Mult / NS                                    | Care: Psychosocial support / distress management<br>HI: Mult / NS<br>Tech: Email / secure messaging, eHealth          | MA: Yes<br>Comp: Yes: Usual Care<br>Type: Systematic<br>QA: Yes<br>MA Out: telehealth interventions produced superior effects relative to control on depression and fatigue, but not distress or quality of life                | No                                         |
| Warrington (2019)<br>Inc: 2000 - 2017<br>N: 77<br>Search: Cancer + self-assessment + telehealth                                                   | Purpose: Describe existing electronic symptom reporting systems and explore which features may be associated with patient engagement and outcomes<br>Conclusion: Comparison across studies is difficult due to diversity of assessments used, although there is some evidence to suggest a positive effect of these systems                         | Ind: Patients<br>Type: Mult / NS<br>Cont: Treatment / symptom management               | Care: Disease detection or management<br>HI: Mult / NS<br>Tech: Email / secure messaging, eHealth, Mobile application | MA: No<br>Comp: No<br>Type: Systematic<br>QA: Yes                                                                                                                                                                               | Yes (feasibility, fidelity)                |
| Wijeratne (2021)<br>Inc: 2015 - 2020<br>N: 18<br>Search: Cancer + self-management + text messaging                                                | Purpose: Describe the use of text-based communications to deliver supportive care in cancer<br>Conclusion: The majority of studies were rated as having a high level of bias and evidence was heterogeneous, but generally interventions were feasible and improved patient satisfaction without detrimental effects on symptoms or quality of life | Ind: Patients<br>Type: Mult / NS<br>Cont: Mult / NS                                    | Care: Mult / NS<br>HI: Mult / NS<br>Tech: Text messaging / SMS                                                        | MA: No<br>Comp: No<br>Type: Systematic<br>QA: Yes                                                                                                                                                                               | Yes (acceptability, feasibility, fidelity) |
| Xu (2019)<br>Inc: earliest available - 2019<br>N: 15<br>Search: Cancer + self-management + fatigue / self-efficacy / quality of life + telehealth | Purpose: Evaluate the effect of eHealth self-management interventions on cancer-related fatigue, self-efficacy, and quality of life among adult cancer patients<br>Conclusion: eHealth self-management interventions were effective for improving cancer-related fatigue and self-efficacy, but not for quality of life.                            | Ind: Patients<br>Type: Mult / NS<br>Cont: Treatment / symptom management, Survivorship | Care: Mult / NS<br>HI: Mult / NS<br>Tech: Synchronous telehealth, eHealth, Mobile application                         | MA: Yes<br>Comp: Yes: Usual Care<br>Type: Systematic<br>QA: Yes<br>MA Out: telehealth interventions produced superior effects on fatigue and self-efficacy, but not quality of life, relative to usual care / wait list control | No                                         |

|                                                                                                                  |                                                                                                                                                                                                                                                                                                                                                        |                                                                            |                                                                                                     |                                                                                                                                                                                 |                                     |
|------------------------------------------------------------------------------------------------------------------|--------------------------------------------------------------------------------------------------------------------------------------------------------------------------------------------------------------------------------------------------------------------------------------------------------------------------------------------------------|----------------------------------------------------------------------------|-----------------------------------------------------------------------------------------------------|---------------------------------------------------------------------------------------------------------------------------------------------------------------------------------|-------------------------------------|
| Yajima (2021)<br>Inc: 2007 - 2019<br>N: 9<br>Search: Hematologic cancer + quality of life + telehealth           | Purpose: Evaluate the utility of telehealth interventions for identifying and monitoring treatment-related symptoms in adult patients with hematologic cancer<br>Conclusion: Telehealth interventions positively impact hematologic cancer patients' health and are acceptable and feasible                                                            | Ind: Patients<br>Type: Hematologic<br>Cont: Treatment / symptom management | Care: Mult / NS<br>HI: Mult / NS<br>Tech: Synchronous telehealth, eHealth, Mobile application       | MA: No<br>Comp: No<br>Type: Not specified<br>QA: No*                                                                                                                            | Yes<br>(acceptability, feasibility) |
| Zhang, D (2020)<br>Inc: earliest available - 2019<br>N: 8<br>Search: Cervical cancer + screening + mobile health | Purpose: Describe published literature on the impact of mHealth on cervical cancer screening and related health behaviors<br>Conclusion: Mobile technologies, particularly telephone reminders or messages, can increase Pap test uptake; evidence was equivocal regarding impact on cervical cancer knowledge                                         | Ind: Patients<br>Type: Gynecologic<br>Cont: Screening / diagnosis          | Care: Health behavior change<br>HI: Mult / NS<br>Tech: Synchronous telehealth, Text messaging / SMS | MA: No<br>Comp: No<br>Type: Systematic<br>QA: Yes                                                                                                                               | No                                  |
| Zhang, H (2022)<br>Inc: earliest available - 2020<br>N: 8<br>Search: Breast cancer + virtual reality             | Purpose: Evaluate the effectiveness on virtual reality interventions on symptoms and rehabilitation management among breast cancer patients<br>Conclusion: Quality of evidence from studies was low, although available evidence suggested a positive impact of virtual reality interventions on symptoms and rehabilitation of breast cancer patients | Ind: Patients<br>Type: Breast<br>Cont: Treatment / symptom monitoring      | Care: Psychosocial support / distress management<br>HI: Mult / NS<br>Tech: Other (Virtual reality)  | MA: Yes<br>Comp: No<br>Type: Systematic<br>QA: Yes<br>MA Out: Virtual reality interventions showed positive impacts on anxiety and abduction of upper limbs, but not on fatigue | No                                  |

|                                                                                                                                                                                         |                                                                                                                                                                                                                                                                                                                                                                                                               |                                                                                     |                                                                  |                                                                                                                                                                                                                                                                                       |                                  |
|-----------------------------------------------------------------------------------------------------------------------------------------------------------------------------------------|---------------------------------------------------------------------------------------------------------------------------------------------------------------------------------------------------------------------------------------------------------------------------------------------------------------------------------------------------------------------------------------------------------------|-------------------------------------------------------------------------------------|------------------------------------------------------------------|---------------------------------------------------------------------------------------------------------------------------------------------------------------------------------------------------------------------------------------------------------------------------------------|----------------------------------|
| Zhang, Q (2018)<br>Inc: earliest available - 2015<br>N: 14<br>Search: Breast cancer + set of psychological and physical symptoms associated with cancer + telephone-based interventions | Purpose: Evaluate the effect of telephone-based interventions on prognostic outcomes and health-related quality of life in breast cancer patients and survivors<br>Conclusion: Telephone-based interventions provided modest effects for anxiety, social function, and health-related quality of life, with stronger effects for self-efficiency, but no effects on depression, fatigue, or physical function | Ind: Patients<br>Type: Breast<br>Cont: Treatment / symptom management, Survivorship | Care: Mult / NS<br>HI: Mult / NS<br>Tech: Synchronous telehealth | MA: Yes<br>Comp: Yes: Usual care<br>Type: Systematic<br>QA: Yes<br>MA Out: telehealth interventions produce superior effects on quality of life and social-domestic function, self-efficacy, and anxiety, but not physiological function, depression, or fatigue, relative to control | No                               |
| Zheng (2020)<br>Inc: earliest available - 2019<br>N: 13<br>Search: Cancer + pain + mHealth                                                                                              | Purpose: Evaluate the evidence on the use of mobile apps for the management of cancer pain<br>Conclusion: Apps including instant messaging modules were associated with reduced pain                                                                                                                                                                                                                          | Ind: Patients<br>Type: Mult / NS<br>Cont: Mult / NS                                 | Care: Mult / NS<br>HI: Mult / NS<br>Tech: Mobile application     | MA: Yes<br>Comp: No* (meta-analysis only of included RCTs with any control)<br>Type: Systematic<br>QA: Yes<br>MA Out: Apps showed positive impacts on pain scores                                                                                                                     | Yes (acceptability, feasibility) |

Notes: Review information includes primary author surname, year review published, Inc = inclusive years of included studies (where not listed, year of publishing utilized), N = number of included studies, and Search = concepts for search strategies; Population includes Ind = targeted individual, Type = cancer type, and Cont = phase of the cancer care continuum; Intervention includes targeted Care = type of intervention or care provided, HI = human involvement, and Tech = technology modality; Study design includes MA = whether a review included a meta-analysis (and if so, MA Out = meta-analytic outcome), Comp = required a comparator for study inclusion, Type = type of review, and QA = if includes a methodological quality or bias assessment (\*not required for non-systematic reviews); Implementation outcomes includes whether (and if so, which) implementation outcomes were extracted and reported from studies; Mult / NS = Multiple or Not Specified. Data also available in Sortable Tables available through Open Science Framework: <https://osf.io/k47hb>
